# Supplementary material for: Transcriptome Sequencing Reveals Tgf-β-Mediated Noncoding RNA Regulatory Mechanisms Involved in DNA Damage in the 661W Photoreceptor Cell Line
Source: MDPI journal article supplement (doi:10.3390/genes13112140), 2022-11-17
Supplement: s1 [file s1]

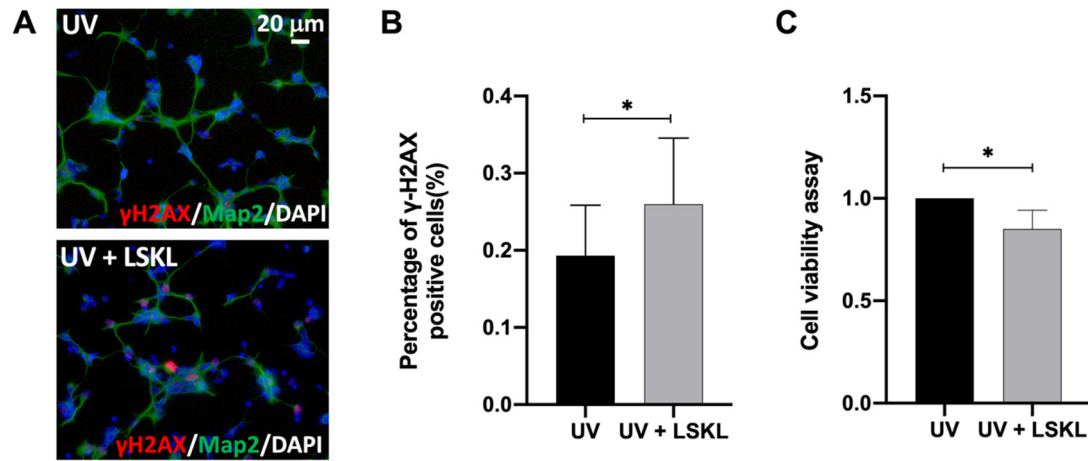

**Figure S1.** LSKL impaired DNA repair and cell viability in primary retinal neurons. Primary retinal neurons were pretreated with LSKL (24 h) or the control vehicle and exposed to UV irradiation. **(A)** The cells were then stained with  $\gamma$ -H2AX (red), Map2 (green) and DAPI (blue). Scale bars: 20  $\mu$ m. **(B)** The percentage of  $\gamma$ -H2AX-positive primary retinal neurons was increased in the UV+LSKL group. **(C)** CCK8 assay showed that the cell viability of primary retinal neurons was impaired by LSKL pretreatment. \* $P$ <0.05.

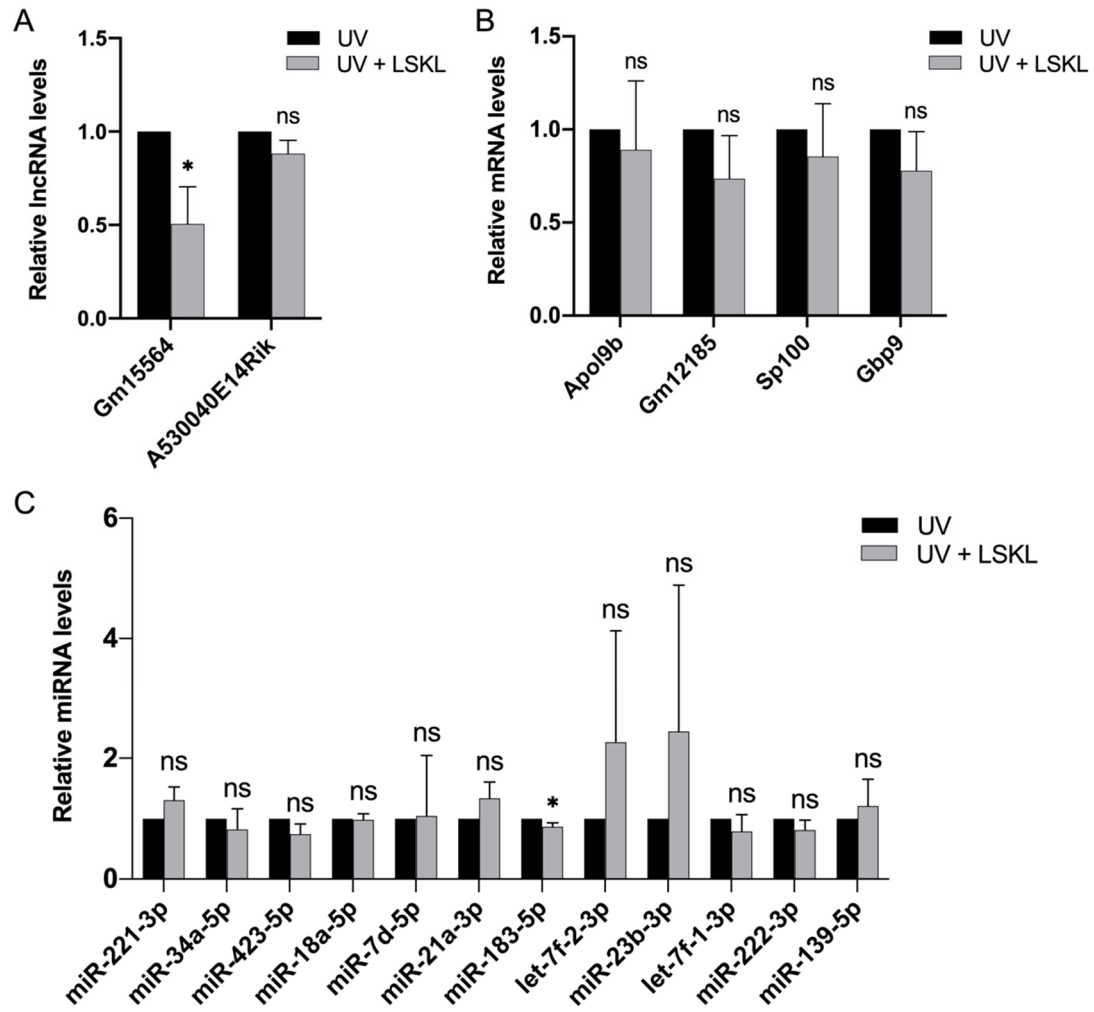

**Figure S2.** Relative RNA levels of lncRNA, miRNA, and mRNA components in the ceRNA network after LSKL treatment in 661W cells. 661W cells were pretreated with LSKL or control vehicle for 24 h and irradiated with UV. 1 h after UV exposure, the expression levels of lncRNAs (**A**), mRNAs (**B**) and miRNAs (**C**) in UV- and UV+LSKL-treated 661W cells were detected by RT-qPCR. Data are presented as the mean  $\pm$  SD from 3 independent experiments. \* $P < 0.05$ . Ns, no significance.

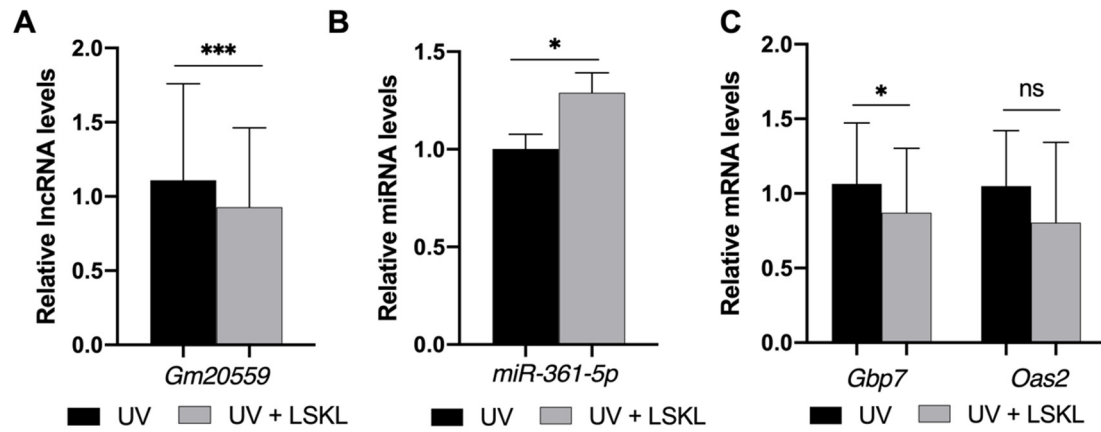

**Figure S3.** Relative RNA levels of lncRNA, miRNA, and mRNA components in the ceRNA network after LSKL treatment in primary retinal neurons. Primary retinal neurons were pretreated with LSKL or control vehicle for 24 h and irradiated with UV. 1 h after UV exposure, the expression levels of lncRNAs (A), mRNAs (B) and miRNAs (C) in UV- and UV + LSKL-treated cells were detected by RT-qPCR. Data are presented as the mean  $\pm$  SD from 3 independent experiments. \* $P < 0.05$ , \*\*\* $P < 0.001$ . Ns, no significance.

Table S1: Primers used for RT-qPCR

| Type   | Name                 | Primer sequences                                           |                           |
|--------|----------------------|------------------------------------------------------------|---------------------------|
|        |                      | Forward 5'—3'                                              | Reverse 5'—3'             |
| mRNA   | <i>Gbp5</i>          | CAGACCTATTGAACGCCAAAGA                                     | TGCCTTGATTCTATCAGCCTCT    |
|        | <i>Gbp7</i>          | AACTGAGGGTGAACCTCAAAGC                                     | GTTCAGACCTAACTGTGGTGC     |
|        | <i>Sp100</i>         | TGATGGAGGGAACCCAACTC                                       | GGATGACCCATTCGGGCTT       |
|        | <i>Pde1a</i>         | TTTCTTGCCTAATTGCCTTTGC                                     | GAGCCAGTGCATGATACCTGT     |
|        | <i>Apo19b</i>        | GGATACCTGTATAGCCTGGTGG                                     | CAGTTCCTCAGAGCTTTGTG      |
|        | <i>Oas2</i>          | AAACCTCACCCCAACGAAAA                                       | CCACCCCTAGCCACTTCCT       |
|        | <i>Gbp9</i>          | TCGCCCTAAGTGTCTTCTG                                        | CGTGGGGATTTCGGGAAGA       |
|        | <i>Gm12185</i>       | GGAGACCACCCTACTGAAGGA                                      | GAAATCCCTCTCCGGGCAA       |
|        | <i>Actin</i>         | AGGTCATCACTATTGGCAACG                                      | ACGGATGTCAACGTCACACTT     |
| lncRNA | <i>Gm15564</i>       | TCTCTCAGTCCCTACCTGCT                                       | GTGCAGAGGAGGAGACAGAA      |
|        | <i>Gm20559</i>       | GGTGGATTGAGCTCCGAGAG                                       | GGCCATGATCTTACTTTGGCC     |
|        | <i>A530040E14Rik</i> | GCCACAGCTTAGGTGTGCTA                                       | CTCCAGGGATGAAGGGACAT      |
|        |                      | RT 5'—3'                                                   | Forward 5'—3'             |
| miRNA  | miR-18a-5p           | GTCGTATCCAGTGCCTGTCGTGGAGTCGGCAATTGCACTGGATAC<br>GACCTATCT | GGGTAAGGTGCATCTAGTGC      |
|        | miR-27a-3p           | GTCGTATCCAGTGCCTGTCGTGGAGTCGGCAATTGCACTGGATAC<br>GACGCGGAA | GGGGTTCACACTGCCTAAG       |
|        | let-7f-2-3p          | GTCGTATCCAGTGCCTGTCGTGGAGTCGGCAATTGCACTGGATAC<br>GACGAAAGA | GGGCGCTATACAGTCTACTG      |
|        | let-7f-1-3p          | GTCGTATCCAGTGCCTGTCGTGGAGTCGGCAATTGCACTGGATAC<br>GACGGGAAG | GGGCGCTATACAATCTATTGC     |
|        | miR-221-3p           | GTCGTATCCAGTGCCTGTCGTGGAGTCGGCAATTGCACTGGATAC<br>GACGAAACC | GGGAGCTACATTGTCTGCTG      |
|        | miR-222-3p           | GTCGTATCCAGTGCCTGTCGTGGAGTCGGCAATTGCACTGGATAC<br>GACACCCAG | GGGGAGCTACATCTGGCTA       |
|        | miR-139-5p           | GTCGTATCCAGTGCCTGTCGTGGAGTCGGCAATTGCACTGGATAC<br>GACCTGGAG | GGGTCTACAGTGCACGTGT       |
|        | miR-23b-3p           | GTCGTATCCAGTGCCTGTCGTGGAGTCGGCAATTGCACTGGATAC<br>GACGGTAAT | GGGATCACATTGCCAGGG        |
|        | let-7d-5p            | GTCGTATCCAGTGCCTGTCGTGGAGTCGGCAATTGCACTGGATAC<br>GACAACAT  | GGGGAGAGGTAGTAGTTGC       |
|        | miR-361-5p           | GTCGTATCCAGTGCCTGTCGTGGAGTCGGCAATTGCACTGGATAC<br>GACGTACCC | GGGGTTATCAGAATCTCCAG      |
|        | miR-423-5p           | GTCGTATCCAGTGCCTGTCGTGGAGTCGGCAATTGCACTGGATAC<br>GACAAAGTC | GGATGAGGGGCAGAGAGCGA      |
|        | miR-34a-5p           | GTCGTATCCAGTGCCTGTCGTGGAGTCGGCAATTGCACTGGATAC<br>GACACAACC | GGGTGGCAGTGTCTTAGCT       |
|        | miR-21a-3p           | GTCGTATCCAGTGCCTGTCGTGGAGTCGGCAATTGCACTGGATAC<br>GACGACAGC | GGGCAACAGCAGTCGATGG       |
|        | miR-183-5p           | GTCGTATCCAGTGCCTGTCGTGGAGTCGGCAATTGCACTGGATAC<br>GACAGTGAA | GGGTATGGCACTGGTAGAA       |
|        | Loop-Reverse         | CAGTGCCTGTCGTGGAGT                                         |                           |
|        | U6                   | CGCTTCACGAATTGCGTGTCTAT                                    | GCTTCGGCAGCACATATACTAAAAT |

Table S2: Sequences of siRNAs and miRNA mimics

| Type         | Name              | Sequences             |                       |
|--------------|-------------------|-----------------------|-----------------------|
|              |                   | Forward 5'—3'         | Reverse 5'—3'         |
| siRNA        | <i>Gm20559</i> #1 | GUACAGGUCUAUCGAAUUATT | UAAUUCGAUAGACCUGUACTT |
|              | <i>Gm20559</i> #2 | GACUACUCCUCCAAUAGAATT | UUCUAUUGGAGGAGUAGUCTT |
|              | <i>Gm20559</i> #3 | CCAGCAAUUGUCACCUAATT  | UUAGGUGACAAUUGCUGGTT  |
| miRNA mimics | miR-361-5p        | UUCACAGUGGCUAAGUCCGC  | GGAACUUAGCCACUGUGAAUU |
