# Supplementary material for: Transcriptome Sequencing Reveals Tgf-β-Mediated Noncoding RNA Regulatory Mechanisms Involved in DNA Damage in the 661W Photoreceptor Cell Line
Source: Genes (Basel). 2022 Nov 17;13(11):2140. doi: 10.3390/genes13112140 (PMC9691224; doi:10.3390/genes13112140)
Supplement: Supplementary file 1 [file genes-13-02140-s001.zip › Supplementary Table S3.xlsx]

## Sheet: All.HTSeq.counts
AccID	MSCTRL1	MSCTRL2	MSCTRL3	MSUV1	MSUV2	MSUV3	MSUVLSK1	MSUVLSK2	MSUVLSK3
ENSMUSG00000029836	1009	909	1185	607	738	776	729	738	646
ENSMUSG00000029837	0	0	0	0	0	0	0	0	0
ENSMUSG00000029830	0	0	4	0	0	0	0	0	0
ENSMUSG00000005864	0	0	0	0	0	0	0	0	0
ENSMUSG00000029831	0	0	0	0	0	0	0	0	2
ENSMUSG00000029832	2	0	0	6	0	4	3	1	2
ENSMUSG00000029833	1771	1695	2019	1006	1050	1204	1189	1175	875
ENSMUSG00000029838	38	23	21	24	21	24	21	24	17
ENSMUSG00000030827	17	34	15	104	101	187	96	79	65
ENSMUSG00000030825	4	2	4	5	2	4	2	3	1
ENSMUSG00000030826	491	468	461	719	668	721	733	744	464
ENSMUSG00000030823	357	316	354	533	545	627	604	608	380
ENSMUSG00000030824	3790	3847	4256	5037	5183	5540	5994	6024	4677
ENSMUSG00000030822	690	800	918	838	848	950	1079	1181	1000
ENSMUSG00000005871	3972	3710	4533	1543	1853	1969	2068	2195	1761
ENSMUSG00000029823	7053	6093	8083	2226	2702	2641	2648	2691	2096
ENSMUSG00000029826	5882	5952	6452	5438	5467	6785	5525	5629	3572
ENSMUSG00000029821	881	832	1002	800	854	892	877	972	746
ENSMUSG00000005873	1759	1871	2024	2400	2539	2815	2614	2762	1840
ENSMUSG00000029822	2701	2499	2843	1413	1522	1859	1808	1898	1386
ENSMUSG00000030816	1727	1665	1908	1531	1641	1800	2010	2147	1722
ENSMUSG00000029828	2	0	4	0	0	4	5	6	1
ENSMUSG00000029829	0	0	0	0	0	2	0	0	0
ENSMUSG00000030814	809	834	846	848	921	880	1125	1099	803
ENSMUSG00000030815	312	320	330	269	311	323	376	369	285
ENSMUSG00000054808	11529	11147	13244	9641	10423	11019	12018	13171	11528
ENSMUSG00000030811	1210	1119	1244	984	1076	1151	1195	1333	909
ENSMUSG00000005846	4341	4120	5074	4442	5291	5691	5205	6094	4551
ENSMUSG00000029813	0	0	0	0	0	0	0	0	0
ENSMUSG00000029814	2154	2209	2541	1377	1648	1723	1842	1964	1503
ENSMUSG00000029815	394	361	394	349	375	423	428	476	317
ENSMUSG00000029810	2687	2570	2686	4199	4123	4850	4417	4234	2930
ENSMUSG00000029811	0	0	0	0	0	0	0	0	0
ENSMUSG00000029816	697	650	668	1127	888	1263	1019	990	704
ENSMUSG00000030805	484	529	583	523	494	583	619	591	576
ENSMUSG00000029817	3749	3689	4273	2978	3928	3730	3844	4115	2984
ENSMUSG00000030806	0	0	2	0	0	0	0	0	0
ENSMUSG00000029819	0	0	0	0	0	0	0	0	0
ENSMUSG00000030804	0	0	0	0	0	0	0	0	0
ENSMUSG00000030801	202	220	228	199	259	289	264	302	237
ENSMUSG00000030802	1759	1772	1958	2216	2211	2590	2821	3099	2317
ENSMUSG00000054814	1470	1469	1799	1074	1286	1378	1340	1512	1009
ENSMUSG00000030800	0	0	1	0	0	2	0	1	1
ENSMUSG00000029802	1799	1603	1933	1561	1754	2013	1904	2093	1305
ENSMUSG00000029804	2585	2351	2881	1171	1276	1400	1621	1417	1000
ENSMUSG00000054827	0	0	0	0	0	0	0	0	0
ENSMUSG00000054823	4710	4644	5309	1964	2181	2307	2430	2551	1923
ENSMUSG00000054822	2	4	0	13	7	11	10	13	7
ENSMUSG00000029878	0	0	0	0	0	0	0	0	0
ENSMUSG00000029875	0	0	2	0	0	0	0	1	0
ENSMUSG00000030869	922	825	1039	788	927	991	1043	1131	902
ENSMUSG00000030867	3146	3333	3704	3376	3689	3608	4266	4815	4142
ENSMUSG00000030868	1243	1299	1560	1372	1528	1596	1721	1733	1511
ENSMUSG00000030865	0	0	0	0	0	0	0	0	0
ENSMUSG00000030866	0	1	1	1	0	0	0	0	0
ENSMUSG00000015222	1616	1650	1887	859	988	1050	1080	968	749
ENSMUSG00000015224	3	4	1	10	2	2	3	2	7
ENSMUSG00000030861	1068	998	1092	995	1035	1175	1122	1133	634
ENSMUSG00000030862	0	0	0	0	0	0	0	0	0
ENSMUSG00000029860	4088	4363	4705	4122	4606	4810	5307	5959	5299
ENSMUSG00000029861	337	406	391	344	355	410	404	394	272
ENSMUSG00000029862	69	74	86	12	19	19	26	27	17
ENSMUSG00000029867	0	0	0	0	0	0	0	0	0
ENSMUSG00000029868	0	0	0	0	0	0	0	0	0
ENSMUSG00000029869	173	134	160	185	200	229	257	193	161
ENSMUSG00000029863	1714	1690	1965	1065	1182	1421	1183	1246	876
ENSMUSG00000029864	0	0	0	0	0	0	2	2	1
ENSMUSG00000029865	0	0	0	0	0	0	0	0	0
ENSMUSG00000029866	0	0	0	0	0	0	0	0	0
ENSMUSG00000030858	2	8	4	1	1	0	1	0	2
ENSMUSG00000030859	0	0	0	0	0	0	0	0	0
ENSMUSG00000030854	2	7	2	9	12	5	7	9	4
ENSMUSG00000030852	1555	1635	1795	859	979	1013	1037	1125	966
ENSMUSG00000030850	1449	1365	1580	856	934	1035	1057	1116	726
ENSMUSG00000030851	0	0	0	1	0	0	0	1	0
ENSMUSG00000005881	1893	1755	1994	2490	2510	2935	2870	2901	2132
ENSMUSG00000005882	950	990	1122	831	1035	990	1121	1133	813
ENSMUSG00000029851	75	50	58	57	62	79	77	84	55
ENSMUSG00000029859	6	17	7	16	18	15	10	7	10
ENSMUSG00000005886	1945	2038	2140	939	995	1154	1189	1185	915
ENSMUSG00000005883	21	31	26	8	11	5	8	15	7
ENSMUSG00000030849	1805	1528	1983	854	913	880	1025	1246	1009
ENSMUSG00000030847	1308	1360	1540	1061	1269	1165	1447	1634	1373
ENSMUSG00000030846	2889	2619	3209	1605	1746	1732	1934	2308	1862
ENSMUSG00000030844	348	341	347	323	397	379	428	446	468
ENSMUSG00000030842	1049	1121	1106	1349	1320	1492	1480	1633	1434
ENSMUSG00000015202	532	462	580	432	507	531	548	533	393
ENSMUSG00000005892	0	0	0	0	0	0	0	0	0
ENSMUSG00000005893	4012	3792	4425	1808	2008	2483	2282	2343	1586
ENSMUSG00000005891	0	0	0	0	0	0	0	0	0
ENSMUSG00000029840	7179	6543	8147	4958	6510	6412	5927	5979	4323
ENSMUSG00000029847	7	8	14	3	2	5	3	0	1
ENSMUSG00000005899	1660	1707	1779	1321	1553	1647	1759	1783	1387
ENSMUSG00000029848	0	0	1	0	0	0	0	0	0
ENSMUSG00000005897	251	238	304	186	197	258	210	184	153
ENSMUSG00000029843	0	0	0	0	0	2	0	1	1
ENSMUSG00000029844	77	84	75	131	121	148	146	159	120
ENSMUSG00000030838	3	1	5	0	2	0	0	0	1
ENSMUSG00000030839	288	288	247	246	261	293	342	359	249
ENSMUSG00000030834	2	2	3	1	0	0	4	1	0
ENSMUSG00000030835	5165	4815	5557	5325	5713	6240	5829	6341	4956
ENSMUSG00000015217	729	738	963	531	548	655	702	896	779
ENSMUSG00000030830	0	0	0	0	0	0	0	0	0
ENSMUSG00000015214	1253	1143	1455	781	917	972	1068	1015	695
ENSMUSG00000088196	0	0	0	0	0	0	0	0	0
ENSMUSG00000088197	0	0	0	0	0	0	0	0	0
ENSMUSG00000088198	0	0	0	0	0	0	0	0	0
ENSMUSG00000088191	0	0	0	0	0	0	0	0	0
ENSMUSG00000088192	0	0	0	0	0	0	0	0	0
ENSMUSG00000088193	0	0	0	0	0	0	0	0	0
ENSMUSG00000088194	0	0	0	0	0	0	0	0	0
ENSMUSG00000088195	0	0	0	0	0	0	0	0	0
ENSMUSG00000005823	727	803	867	1075	1085	1280	1198	1403	941
ENSMUSG00000005824	0	0	0	0	0	0	0	0	0
ENSMUSG00000088164	0	0	0	0	0	0	0	0	0
ENSMUSG00000064194	1	1	1	0	3	0	0	0	0
ENSMUSG00000088165	0	0	0	0	0	0	0	0	0
ENSMUSG00000088166	0	0	0	0	0	0	0	0	0
ENSMUSG00000088167	0	0	0	0	0	0	0	0	0
ENSMUSG00000088168	9	10	17	0	0	1	1	3	2
ENSMUSG00000088169	0	0	0	0	0	0	0	0	0
ENSMUSG00000064193	7852	7027	8045	10620	12088	12931	13050	13163	9164
ENSMUSG00000088160	0	0	0	0	0	0	0	0	0
ENSMUSG00000088161	0	0	0	0	0	0	0	0	0
ENSMUSG00000088162	0	1	0	0	0	0	0	0	0
ENSMUSG00000088152	0	0	0	0	0	0	0	0	0
ENSMUSG00000088153	0	0	0	0	0	0	0	0	0
ENSMUSG00000088154	0	0	0	0	0	0	0	0	0
ENSMUSG00000088155	0	0	0	0	0	0	0	0	0
ENSMUSG00000088156	0	0	0	0	0	0	0	0	0
ENSMUSG00000088157	0	0	0	0	0	0	0	0	0
ENSMUSG00000005836	17	24	24	15	36	29	24	18	14
ENSMUSG00000088158	3	0	1	1	0	2	0	0	0
ENSMUSG00000088159	0	0	0	0	0	0	0	0	0
ENSMUSG00000088150	3	1	1	0	0	1	0	0	0
ENSMUSG00000088151	19	21	34	0	2	2	1	3	2
ENSMUSG00000005802	5992	5371	6716	4055	4621	5390	4772	4524	3149
ENSMUSG00000005800	0	0	0	1	0	0	0	0	0
ENSMUSG00000088185	231	220	223	422	559	466	542	494	365
ENSMUSG00000088187	0	0	0	0	0	0	0	0	0
ENSMUSG00000088188	0	0	0	0	0	0	0	0	0
ENSMUSG00000088189	0	0	0	0	0	0	0	0	0
ENSMUSG00000005803	272	270	277	351	369	457	445	447	328
ENSMUSG00000005804	613	568	652	664	700	799	807	750	481
ENSMUSG00000088180	0	0	0	0	0	0	0	0	0
ENSMUSG00000088181	0	0	0	0	0	0	0	0	0
ENSMUSG00000088182	0	0	0	0	0	0	0	0	0
ENSMUSG00000088183	0	0	0	0	0	0	0	0	0
ENSMUSG00000088184	0	0	0	0	0	0	0	0	0
ENSMUSG00000005813	2595	2499	3099	2002	2277	2342	2325	2596	1816
ENSMUSG00000088175	0	0	0	0	0	0	0	0	0
ENSMUSG00000088176	26	24	18	1	1	3	3	2	1
ENSMUSG00000088177	0	0	0	0	0	0	0	1	0
ENSMUSG00000088179	0	0	0	0	0	0	0	0	0
ENSMUSG00000088170	9	6	4	0	0	0	1	2	0
ENSMUSG00000088171	2	0	1	1	0	0	0	0	0
ENSMUSG00000088172	0	0	0	0	0	0	0	0	0
ENSMUSG00000113650	164	151	167	43	42	47	52	44	46
ENSMUSG00000113651	7	9	20	9	15	20	20	20	22
ENSMUSG00000113652	0	0	0	0	0	0	0	0	0
ENSMUSG00000113653	0	0	0	0	0	0	0	0	0
ENSMUSG00000113654	0	0	0	0	0	0	0	0	0
ENSMUSG00000113655	0	0	0	0	0	0	0	0	0
ENSMUSG00000113656	46	55	80	6	1	8	7	6	4
ENSMUSG00000113657	0	0	0	0	0	0	0	0	0
ENSMUSG00000088248	14	12	9	0	0	1	1	0	2
ENSMUSG00000088249	0	0	0	0	0	0	0	0	0
ENSMUSG00000088240	0	0	0	0	0	0	0	0	0
ENSMUSG00000088241	0	0	0	0	0	0	0	0	0
ENSMUSG00000088242	3	1	4	1	0	0	0	0	0
ENSMUSG00000064272	3	0	0	0	0	0	0	2	1
ENSMUSG00000088243	0	0	0	0	0	0	0	0	0
ENSMUSG00000088244	0	0	0	0	0	0	0	0	0
ENSMUSG00000088245	0	0	0	0	0	0	0	0	0
ENSMUSG00000088246	0	0	0	0	2	0	1	2	2
ENSMUSG00000113658	0	0	0	0	0	0	0	0	0
ENSMUSG00000113659	3	0	0	0	0	0	0	0	0
ENSMUSG00000113661	0	0	0	0	0	0	0	0	0
ENSMUSG00000113662	2	4	7	5	7	8	10	4	5
ENSMUSG00000113663	0	0	0	0	0	0	0	0	0
ENSMUSG00000113664	0	0	1	0	0	0	0	0	3
ENSMUSG00000113665	1	0	0	0	0	0	3	1	0
ENSMUSG00000113666	0	0	0	0	0	0	0	0	0
ENSMUSG00000113667	0	0	0	0	0	0	0	0	0
ENSMUSG00000113668	0	0	0	0	0	0	0	0	0
ENSMUSG00000088237	0	0	0	0	0	0	0	0	0
ENSMUSG00000088239	1	0	0	0	0	0	0	0	0
ENSMUSG00000113660	0	0	0	1	0	0	0	0	0
ENSMUSG00000064284	73	59	74	96	86	111	122	118	84
ENSMUSG00000040296	2873	2993	3154	4554	4295	5770	3756	3326	1786
ENSMUSG00000088230	0	0	0	0	0	0	0	0	0
ENSMUSG00000040297	2144	2021	2373	972	1210	1280	1215	1118	833
ENSMUSG00000088231	0	0	0	0	0	0	0	0	0
ENSMUSG00000040298	3	2	1	1	0	2	2	3	2
ENSMUSG00000088232	0	0	0	0	0	0	0	0	0
ENSMUSG00000064288	2017	2311	2282	3384	3675	3604	4349	4059	4401
ENSMUSG00000088233	0	0	0	0	0	0	0	0	0
ENSMUSG00000064289	774	771	979	479	656	559	625	665	543
ENSMUSG00000088234	0	0	0	0	0	0	0	0	0
ENSMUSG00000088236	0	0	0	0	0	0	0	0	0
ENSMUSG00000113669	3	6	4	0	0	0	0	0	0
ENSMUSG00000064280	0	0	2	0	1	2	0	0	3
ENSMUSG00000064281	1	0	0	0	0	0	0	0	0
ENSMUSG00000113672	0	0	0	0	0	0	0	0	0
ENSMUSG00000113673	0	1	0	0	0	0	0	0	0
ENSMUSG00000113674	0	0	0	0	0	0	0	0	0
ENSMUSG00000113675	1	2	2	0	0	0	0	0	0
ENSMUSG00000113676	0	0	0	0	0	0	0	0	0
ENSMUSG00000113677	0	0	0	0	0	0	0	0	0
ENSMUSG00000113678	0	0	0	0	0	0	0	0	0
ENSMUSG00000113679	0	1	1	0	0	0	1	3	1
ENSMUSG00000040289	10	7	6	6	11	10	6	14	17
ENSMUSG00000113670	0	0	0	0	0	0	0	0	0
ENSMUSG00000113671	0	0	0	0	0	0	0	0	0
ENSMUSG00000040284	0	0	0	0	0	0	0	0	0
ENSMUSG00000039296	0	2	0	0	0	0	0	0	0
ENSMUSG00000064293	1	0	2	2	0	1	1	1	0
ENSMUSG00000088264	0	0	0	0	0	0	0	0	0
ENSMUSG00000039294	775	735	817	853	1023	1022	1054	1197	794
ENSMUSG00000040287	30	33	40	12	9	19	16	12	11
ENSMUSG00000064294	1	0	0	0	0	0	0	0	1
ENSMUSG00000088265	0	0	0	0	0	0	0	0	0
ENSMUSG00000040280	1	1	0	1	8	2	0	2	1
ENSMUSG00000064299	0	0	1	0	0	0	0	0	1
ENSMUSG00000088266	0	0	0	0	0	0	0	0	0
ENSMUSG00000040282	467	574	578	418	436	469	474	480	361
ENSMUSG00000088268	0	0	0	0	0	0	0	0	0
ENSMUSG00000039298	2429	2328	2567	1320	1283	1550	1620	1648	1347
ENSMUSG00000040283	0	3	2	0	0	1	0	0	0
ENSMUSG00000088269	0	0	0	0	0	0	0	0	0
ENSMUSG00000088260	0	0	0	0	0	0	0	0	0
ENSMUSG00000088261	0	0	0	0	0	0	0	0	0
ENSMUSG00000113683	0	0	0	0	0	0	0	0	0
ENSMUSG00000113684	0	0	0	0	0	0	0	0	0
ENSMUSG00000113685	0	0	0	0	0	0	0	0	0
ENSMUSG00000113686	0	0	0	0	0	0	0	0	0
ENSMUSG00000113687	7	7	10	0	3	0	2	0	1
ENSMUSG00000113688	2	1	3	1	0	0	1	0	1
ENSMUSG00000113689	0	0	0	0	0	0	0	0	0
ENSMUSG00000088259	4	4	4	0	0	0	0	0	1
ENSMUSG00000113680	0	0	0	0	0	0	0	0	0
ENSMUSG00000113681	1	1	1	0	0	0	0	1	0
ENSMUSG00000113682	1	1	0	0	0	0	0	0	0
ENSMUSG00000039285	731	697	827	586	659	734	691	624	486
ENSMUSG00000040274	6634	6559	7533	1450	1548	1560	1721	1691	1243
ENSMUSG00000088252	13	8	8	17	17	24	19	29	35
ENSMUSG00000088253	0	0	0	0	0	0	0	0	0
ENSMUSG00000040276	0	0	0	0	0	0	0	0	0
ENSMUSG00000088254	12	5	5	3	4	0	8	7	2
ENSMUSG00000088255	0	0	0	0	0	0	0	0	0
ENSMUSG00000040270	1046	1016	1143	220	292	293	338	312	190
ENSMUSG00000039286	5761	5943	6781	2793	2875	3210	3401	3423	2300
ENSMUSG00000088257	0	0	0	0	0	0	0	0	0
ENSMUSG00000040272	404	375	419	214	231	329	314	342	231
ENSMUSG00000088258	0	0	0	0	0	0	0	0	0
ENSMUSG00000088250	0	0	0	0	0	0	0	0	0
ENSMUSG00000078881	4	2	4	6	7	9	3	4	2
ENSMUSG00000113694	0	0	0	0	0	0	0	0	0
ENSMUSG00000113695	1	0	1	0	1	0	0	0	0
ENSMUSG00000113696	0	0	0	0	2	0	0	0	2
ENSMUSG00000078880	0	0	0	0	0	0	0	0	1
ENSMUSG00000113697	0	0	0	0	0	0	0	0	0
ENSMUSG00000113698	0	0	0	0	0	0	0	0	0
ENSMUSG00000078886	1	0	0	0	0	0	0	0	0
ENSMUSG00000113699	2	2	4	3	2	1	2	5	0
ENSMUSG00000088204	0	0	0	0	0	0	0	0	0
ENSMUSG00000088205	0	0	0	0	0	0	0	0	0
ENSMUSG00000088207	0	0	0	0	0	0	0	0	0
ENSMUSG00000088208	0	0	0	3	0	1	0	0	0
ENSMUSG00000113690	51	33	41	10	7	4	9	7	3
ENSMUSG00000088209	0	0	0	0	0	0	0	0	0
ENSMUSG00000113691	0	0	0	0	0	0	0	0	0
ENSMUSG00000113692	0	0	0	0	0	0	0	0	0
ENSMUSG00000113693	0	0	0	0	0	0	0	0	0
ENSMUSG00000088200	5	0	9	0	0	0	0	0	0
ENSMUSG00000088201	4	2	2	0	0	0	0	0	0
ENSMUSG00000064231	0	0	0	0	0	0	0	0	0
ENSMUSG00000064232	0	0	0	0	0	0	0	0	0
ENSMUSG00000088203	0	0	0	0	0	0	0	0	0
ENSMUSG00000078889	59	29	55	16	29	32	25	21	20
ENSMUSG00000078887	34	19	22	18	21	12	12	10	14
ENSMUSG00000078870	99	103	109	45	51	38	46	53	65
ENSMUSG00000078875	15	11	31	6	3	2	10	8	6
ENSMUSG00000078872	51	43	91	14	23	11	21	20	14
ENSMUSG00000064246	2	2	0	3	4	5	3	8	1
ENSMUSG00000064247	0	0	0	0	0	1	0	0	3
ENSMUSG00000078878	68	62	82	43	49	41	26	39	34
ENSMUSG00000078879	11	7	8	0	0	0	0	1	0
ENSMUSG00000078876	5	7	8	1	1	4	5	1	1
ENSMUSG00000078877	102	59	106	61	87	62	65	53	45
ENSMUSG00000064259	0	0	0	0	0	0	0	0	0
ENSMUSG00000088226	53	39	47	9	9	5	6	6	2
ENSMUSG00000088227	0	0	0	0	0	0	0	0	0
ENSMUSG00000088228	0	0	0	0	0	0	0	0	0
ENSMUSG00000088229	0	0	0	0	0	0	0	0	0
ENSMUSG00000064252	0	0	0	0	0	0	0	0	0
ENSMUSG00000088220	0	0	0	0	0	0	0	0	0
ENSMUSG00000088221	0	0	0	0	0	0	0	0	0
ENSMUSG00000088222	0	0	0	0	0	0	0	0	0
ENSMUSG00000088223	0	0	0	0	0	0	0	0	0
ENSMUSG00000088224	9	8	10	1	3	0	1	1	4
ENSMUSG00000064254	619	527	623	944	828	1016	969	1020	718
ENSMUSG00000088225	0	0	0	0	0	0	0	0	0
ENSMUSG00000078891	0	0	0	0	0	0	0	0	0
ENSMUSG00000078896	0	0	0	0	5	1	0	1	1
ENSMUSG00000078897	0	0	0	0	0	0	0	0	0
ENSMUSG00000078894	5	2	6	0	1	0	0	3	3
ENSMUSG00000078895	1	1	3	1	2	0	0	1	0
ENSMUSG00000088216	0	0	0	0	0	0	0	0	0
ENSMUSG00000088217	3	3	10	2	2	0	1	0	0
ENSMUSG00000088218	0	0	0	0	0	0	0	0	0
ENSMUSG00000088219	0	0	0	0	0	0	0	0	0
ENSMUSG00000064262	0	0	0	0	1	0	0	0	0
ENSMUSG00000064263	2	0	0	1	0	0	0	0	0
ENSMUSG00000088210	0	0	0	0	0	0	0	0	0
ENSMUSG00000088211	0	0	0	0	0	0	0	0	0
ENSMUSG00000064267	0	0	3	0	1	0	3	0	2
ENSMUSG00000088212	0	0	0	0	0	0	0	0	0
ENSMUSG00000064264	120	139	154	170	176	150	167	228	182
ENSMUSG00000088213	0	0	0	0	0	0	0	0	0
ENSMUSG00000078898	1	1	1	0	0	0	0	0	0
ENSMUSG00000078899	0	0	0	0	0	0	0	0	0
ENSMUSG00000054871	34	39	43	50	38	56	63	63	48
ENSMUSG00000078840	0	0	1	0	0	0	0	0	0
ENSMUSG00000040229	0	0	0	0	0	0	0	0	0
ENSMUSG00000040225	13685	13763	16433	4934	5490	5652	6636	7182	6356
ENSMUSG00000039230	2944	2739	3273	2853	2969	3554	3187	3508	2408
ENSMUSG00000040220	765	695	801	462	484	523	616	658	603
ENSMUSG00000039233	855	877	952	409	449	561	552	560	375
ENSMUSG00000039234	5129	4926	5651	3571	3890	4156	4420	4837	3526
ENSMUSG00000039231	2812	3081	3324	2614	3001	3038	3054	3479	2553
ENSMUSG00000039232	127	153	133	101	119	162	162	172	88
ENSMUSG00000039238	0	0	0	0	0	0	0	0	0
ENSMUSG00000039236	233	213	252	390	403	411	416	376	305
ENSMUSG00000054874	2980	3145	3403	2466	2557	2703	2928	3049	2430
ENSMUSG00000039239	442	491	567	333	323	369	360	398	254
ENSMUSG00000078847	0	0	0	0	0	0	0	0	0
ENSMUSG00000030890	4437	4374	5054	5577	5823	6630	6900	7471	5278
ENSMUSG00000040219	45	30	42	30	38	30	49	34	29
ENSMUSG00000040217	0	0	0	0	0	0	0	0	0
ENSMUSG00000064202	0	3	2	0	1	0	3	1	0
ENSMUSG00000064208	15	28	10	22	17	21	21	25	21
ENSMUSG00000040212	469	470	498	492	602	535	630	711	751
ENSMUSG00000040213	217	212	231	257	272	344	307	307	161
ENSMUSG00000064201	0	0	0	0	0	0	0	0	0
ENSMUSG00000039220	2296	2612	2726	2031	2243	2246	2569	3004	2341
ENSMUSG00000039221	307	260	316	420	541	571	532	582	480
ENSMUSG00000054889	0	1	0	0	0	0	1	2	0
ENSMUSG00000030898	0	0	0	0	0	1	0	0	0
ENSMUSG00000039224	0	0	1	0	0	0	0	0	0
ENSMUSG00000054885	0	0	0	0	0	0	0	0	0
ENSMUSG00000078838	9	9	3	0	1	2	0	3	3
ENSMUSG00000030897	1	2	0	1	2	0	4	2	4
ENSMUSG00000030894	1572	1603	1783	2080	2075	2438	2313	2323	1647
ENSMUSG00000030895	9	21	16	10	6	11	14	17	5
ENSMUSG00000030881	1469	1425	1617	1583	1792	1786	2008	2246	1536
ENSMUSG00000054892	9	8	12	9	4	3	10	11	1
ENSMUSG00000030882	55	45	64	11	16	12	16	19	12
ENSMUSG00000054893	50	41	53	49	59	53	60	79	37
ENSMUSG00000054894	59	73	96	79	102	119	86	104	75
ENSMUSG00000030880	723	673	866	449	495	548	534	650	495
ENSMUSG00000040209	11	12	24	6	6	7	10	1	5
ENSMUSG00000078864	131	108	131	61	58	63	61	94	101
ENSMUSG00000054890	0	0	0	0	0	0	0	0	0
ENSMUSG00000078861	133	77	165	94	101	100	82	90	67
ENSMUSG00000078862	164	125	178	123	146	127	153	137	113
ENSMUSG00000040204	2733	2630	3182	2231	2986	2816	3010	3007	2024
ENSMUSG00000064215	1531	1409	1453	2561	3184	3539	3285	3231	1739
ENSMUSG00000040205	3	0	0	0	1	0	0	1	0
ENSMUSG00000064213	0	0	0	0	0	0	0	0	0
ENSMUSG00000015242	0	0	0	0	0	0	0	0	0
ENSMUSG00000015243	2233	2145	2135	1345	1395	1752	1429	1375	733
ENSMUSG00000039210	929	802	997	446	531	521	572	556	372
ENSMUSG00000064210	4590	4481	5229	2996	3200	3512	3763	4166	3022
ENSMUSG00000030889	9	8	14	0	0	0	5	3	3
ENSMUSG00000039215	0	0	0	0	0	0	0	0	0
ENSMUSG00000078867	183	140	195	133	151	129	103	109	97
ENSMUSG00000078868	82	82	113	36	32	46	40	34	44
ENSMUSG00000030887	8	1	5	1	1	7	2	0	4
ENSMUSG00000078865	3	2	1	1	1	0	1	0	0
ENSMUSG00000030888	758	838	890	699	928	917	940	1255	881
ENSMUSG00000078866	198	165	253	107	121	127	93	151	140
ENSMUSG00000039219	1274	1198	1466	533	583	574	573	576	478
ENSMUSG00000039217	137	129	152	139	146	182	191	156	117
ENSMUSG00000078869	11	8	16	8	5	6	9	7	4
ENSMUSG00000015247	453	493	510	524	616	637	673	670	441
ENSMUSG00000030884	3377	3148	3543	4022	4445	4959	4676	5341	3493
ENSMUSG00000039218	24692	25207	29479	11634	12545	12796	15393	16392	13665
ENSMUSG00000030870	2040	2103	2252	1279	1418	1446	1467	1694	1093
ENSMUSG00000029882	0	0	1	0	0	0	0	0	0
ENSMUSG00000030871	350	307	345	268	274	305	224	345	262
ENSMUSG00000029883	0	0	0	0	0	0	0	0	0
ENSMUSG00000078853	426	398	458	2057	1643	2591	1114	992	399
ENSMUSG00000113600	23	8	28	15	21	27	25	31	16
ENSMUSG00000078850	0	0	0	0	0	0	0	0	0
ENSMUSG00000113601	53	35	46	11	18	22	11	18	18
ENSMUSG00000078851	44	27	40	38	41	54	53	67	44
ENSMUSG00000113602	0	0	0	0	0	0	0	0	0
ENSMUSG00000064224	0	0	0	0	0	0	0	0	0
ENSMUSG00000064225	0	0	0	0	0	0	0	0	0
ENSMUSG00000029885	0	0	0	0	0	0	0	0	0
ENSMUSG00000039200	0	0	0	0	0	0	0	0	0
ENSMUSG00000039201	583	550	648	534	582	662	598	701	550
ENSMUSG00000064223	0	0	0	0	0	0	0	0	0
ENSMUSG00000064220	0	0	0	0	0	1	0	0	0
ENSMUSG00000030878	870	773	1023	866	1022	932	1179	1252	946
ENSMUSG00000113603	7	10	7	2	0	0	2	1	3
ENSMUSG00000030879	1673	1575	1940	2508	2573	2910	2661	3032	2252
ENSMUSG00000039205	915	1005	1203	772	834	900	965	1076	952
ENSMUSG00000113604	0	0	0	0	0	0	0	0	0
ENSMUSG00000030876	1916	1921	2173	2047	2574	2790	2621	2760	2067
ENSMUSG00000039202	7272	7021	8017	4596	4858	5297	5485	5853	4096
ENSMUSG00000113605	0	0	0	0	0	0	0	0	0
ENSMUSG00000030877	5	7	10	9	5	13	7	6	7
ENSMUSG00000113606	0	1	0	0	0	1	1	2	0
ENSMUSG00000039208	449	398	459	384	451	435	521	514	435
ENSMUSG00000113607	0	0	0	0	0	0	0	0	0
ENSMUSG00000039209	0	0	0	0	0	0	0	0	0
ENSMUSG00000113608	0	0	0	0	0	0	0	0	0
ENSMUSG00000030872	1143	1123	1273	1128	1129	1341	1258	1350	910
ENSMUSG00000039206	195	167	215	178	192	224	187	197	154
ENSMUSG00000113609	0	0	0	0	0	0	0	0	0
ENSMUSG00000030873	0	0	0	0	0	0	0	0	0
ENSMUSG00000113610	15	16	17	3	4	2	8	10	4
ENSMUSG00000113611	0	0	3	1	1	0	1	0	2
ENSMUSG00000113612	0	0	0	0	0	0	0	0	0
ENSMUSG00000113613	0	0	0	0	0	0	0	0	0
ENSMUSG00000040268	1870	1951	2188	1099	1172	1343	1325	1325	988
ENSMUSG00000040269	118	77	114	109	142	113	117	135	139
ENSMUSG00000040263	880	732	954	561	610	680	711	865	713
ENSMUSG00000040264	1	0	2	1	3	5	0	4	0
ENSMUSG00000040265	2	4	11	0	3	5	6	1	1
ENSMUSG00000078808	0	0	0	0	1	1	3	2	0
ENSMUSG00000039278	0	0	0	0	0	0	0	0	0
ENSMUSG00000039275	3365	3623	4033	2845	3124	3276	3521	3827	2838
ENSMUSG00000040260	5	2	2	3	2	1	2	3	1
ENSMUSG00000113614	0	0	0	0	0	0	0	0	0
ENSMUSG00000113615	0	0	0	0	0	0	0	1	1
ENSMUSG00000054836	281	223	327	235	322	296	261	369	245
ENSMUSG00000113616	0	0	0	0	0	0	0	0	0
ENSMUSG00000078800	0	0	0	0	0	0	0	0	0
ENSMUSG00000113617	0	0	0	0	0	0	0	0	0
ENSMUSG00000113618	0	0	0	0	0	0	0	0	0
ENSMUSG00000113619	1	0	1	0	0	1	1	0	1
ENSMUSG00000113620	0	0	0	0	0	0	0	0	0
ENSMUSG00000113621	1	1	0	0	0	0	0	0	0
ENSMUSG00000113622	0	0	0	0	0	0	0	0	0
ENSMUSG00000113623	8	6	8	2	1	3	2	0	0
ENSMUSG00000113624	0	0	0	0	0	0	0	0	0
ENSMUSG00000039270	445	415	476	218	260	274	283	328	212
ENSMUSG00000040258	40	26	49	57	63	101	80	47	47
ENSMUSG00000039262	11286	11426	12647	6175	6385	6608	7375	7906	5945
ENSMUSG00000039263	903	895	1006	1096	1095	1350	1362	1463	991
ENSMUSG00000040253	413	359	427	1042	861	1202	584	474	213
ENSMUSG00000040254	22	11	26	13	27	18	12	7	5
ENSMUSG00000039264	0	0	0	0	1	0	0	0	0
ENSMUSG00000040250	1268	1254	1470	1087	1265	1366	1320	1595	1036
ENSMUSG00000113625	13	11	8	3	13	27	9	9	11
ENSMUSG00000113626	118	64	140	52	90	58	58	44	54
ENSMUSG00000113627	0	0	0	0	0	0	0	0	0
ENSMUSG00000039269	0	0	0	0	0	0	0	0	1
ENSMUSG00000113628	0	0	0	0	0	0	0	0	0
ENSMUSG00000113629	1	2	1	0	0	0	0	0	0
ENSMUSG00000054843	1458	1368	1606	864	970	1096	1091	1064	712
ENSMUSG00000054850	3	4	1	1	0	1	0	0	0
ENSMUSG00000113630	0	0	0	0	0	0	0	0	0
ENSMUSG00000113631	0	0	0	0	0	0	0	0	0
ENSMUSG00000113632	0	0	0	0	0	0	0	0	0
ENSMUSG00000113633	0	0	0	0	0	0	0	0	0
ENSMUSG00000113634	0	0	0	0	0	0	0	0	0
ENSMUSG00000113635	0	0	0	0	0	0	0	0	0
ENSMUSG00000040249	46918	44252	51113	30490	29726	35723	34770	34912	26126
ENSMUSG00000015290	894	932	1086	1149	1192	1277	1310	1401	1120
ENSMUSG00000040247	20	18	22	9	6	8	6	10	8
ENSMUSG00000039252	0	0	2	0	0	1	0	0	0
ENSMUSG00000040242	1024	911	1114	699	928	893	882	875	738
ENSMUSG00000039253	478	491	547	418	502	534	555	595	439
ENSMUSG00000039254	615	609	653	615	559	617	601	646	507
ENSMUSG00000113636	0	0	0	0	0	0	0	0	0
ENSMUSG00000113637	213	163	213	188	212	267	236	243	168
ENSMUSG00000039257	0	0	0	0	0	0	0	0	0
ENSMUSG00000113638	0	0	0	0	0	0	0	0	0
ENSMUSG00000113639	0	0	0	0	0	0	0	0	0
ENSMUSG00000015289	450	488	584	578	688	684	676	743	599
ENSMUSG00000054855	951	869	1112	1168	1191	1591	1480	1511	1294
ENSMUSG00000113640	0	0	0	0	0	0	0	0	0
ENSMUSG00000113641	0	0	0	0	0	0	0	0	0
ENSMUSG00000113642	2	2	5	0	2	4	7	3	1
ENSMUSG00000113643	0	0	0	0	0	0	0	0	0
ENSMUSG00000113644	0	0	0	0	0	0	0	0	0
ENSMUSG00000113645	0	0	0	0	0	0	0	0	0
ENSMUSG00000113646	0	0	1	0	0	0	0	0	0
ENSMUSG00000040234	310	335	372	425	450	540	485	450	284
ENSMUSG00000040236	482	556	580	589	670	860	801	857	666
ENSMUSG00000040231	5	4	7	11	8	9	7	14	13
ENSMUSG00000015291	3321	3409	3693	2658	2801	3336	3451	3449	2301
ENSMUSG00000039244	563	527	641	568	676	658	621	727	583
ENSMUSG00000039242	755	713	885	568	548	633	580	656	478
ENSMUSG00000078812	13908	16778	17314	17680	20331	20003	22243	26549	22311
ENSMUSG00000113647	1	2	3	6	6	6	4	10	5
ENSMUSG00000078813	98	91	106	97	115	95	147	140	142
ENSMUSG00000113648	0	0	0	0	0	0	0	0	0
ENSMUSG00000039246	80	81	79	86	100	145	92	122	76
ENSMUSG00000078810	0	0	0	0	0	0	0	2	0
ENSMUSG00000113649	26	13	18	0	4	3	0	3	0
ENSMUSG00000054863	19	24	27	1	5	10	21	18	40
ENSMUSG00000078816	176	174	189	29	26	33	33	38	23
ENSMUSG00000078817	0	0	0	0	0	0	0	0	0
ENSMUSG00000078815	0	1	4	1	0	1	0	1	1
ENSMUSG00000029713	4708	4847	5151	6114	6702	6971	7313	8044	5407
ENSMUSG00000029714	804	861	979	513	457	637	550	540	346
ENSMUSG00000029715	205	198	232	285	312	312	333	337	318
ENSMUSG00000029716	0	0	2	2	1	4	3	2	0
ENSMUSG00000029710	1021	969	1022	1040	1014	1154	1160	1171	761
ENSMUSG00000029711	0	0	0	0	0	0	0	0	0
ENSMUSG00000029712	0	0	0	0	0	0	0	0	0
ENSMUSG00000030708	0	0	0	0	0	2	0	0	0
ENSMUSG00000030706	630	596	713	655	786	790	776	842	716
ENSMUSG00000029718	5202	5292	5737	7192	7616	8197	7692	8081	6316
ENSMUSG00000030707	8	4	7	13	10	10	14	14	10
ENSMUSG00000030704	1849	1810	2423	1572	2109	1962	1992	1924	1524
ENSMUSG00000030703	47	60	63	12	14	16	17	17	18
ENSMUSG00000030701	0	0	0	2	1	1	0	0	1
ENSMUSG00000029703	1062	1028	1108	1235	1283	1392	1351	1438	1084
ENSMUSG00000029705	3371	3568	3990	1324	1484	1612	1770	1956	1536
ENSMUSG00000029700	0	0	0	0	0	1	0	0	0
ENSMUSG00000029701	2686	2571	3089	2083	2081	2358	2244	2561	2058
ENSMUSG00000029706	0	1	0	0	0	0	0	0	0
ENSMUSG00000029707	13	15	18	6	1	5	6	9	6
ENSMUSG00000029708	584	537	653	689	706	845	763	892	639
ENSMUSG00000005732	2148	2251	2851	2528	2853	3079	3065	3292	2738
ENSMUSG00000054708	88	93	113	73	97	104	104	87	65
ENSMUSG00000054702	108	120	142	90	96	85	97	80	55
ENSMUSG00000029752	7001	7118	7933	12153	12922	16656	11271	12868	8036
ENSMUSG00000029757	0	0	0	0	0	1	0	0	0
ENSMUSG00000029759	1716	1548	1899	1226	1357	1564	1497	1609	1028
ENSMUSG00000029754	1	0	3	2	0	0	0	0	4
ENSMUSG00000029755	0	0	0	0	0	0	0	0	1
ENSMUSG00000030748	1060	992	1146	848	908	1184	1127	1130	767
ENSMUSG00000030747	249	225	281	373	349	410	355	377	259
ENSMUSG00000030744	11232	11319	13365	14908	16301	18196	17785	19349	18522
ENSMUSG00000030745	0	0	0	0	0	0	0	0	0
ENSMUSG00000030742	11	7	4	6	1	3	3	5	3
ENSMUSG00000030741	662	670	738	937	971	1032	949	1028	717
ENSMUSG00000030739	0	2	0	0	1	0	2	0	0
ENSMUSG00000030737	0	0	0	0	0	0	1	0	0
ENSMUSG00000030738	11846	11434	13237	14649	14831	17958	14626	16917	12747
ENSMUSG00000030735	7	14	6	9	10	15	18	13	10
ENSMUSG00000030733	1074	1116	1229	1101	1087	1305	1201	1377	1058
ENSMUSG00000015112	1892	1980	2204	1790	1954	2237	1958	2182	1416
ENSMUSG00000030731	1	0	0	1	1	1	0	1	1
ENSMUSG00000030732	0	0	0	0	0	0	0	0	0
ENSMUSG00000030730	4	0	7	4	3	5	0	0	0
ENSMUSG00000029730	6934	6701	7470	7264	7658	9050	9212	10034	7414
ENSMUSG00000029735	144	154	172	77	100	113	122	98	82
ENSMUSG00000029736	0	0	1	2	0	0	3	2	0
ENSMUSG00000005763	0	0	0	0	0	0	0	0	0
ENSMUSG00000030729	583	524	604	288	395	434	433	417	307
ENSMUSG00000030726	1140	1200	1364	1004	1115	1148	1286	1235	997
ENSMUSG00000030727	486	492	540	526	556	563	587	616	468
ENSMUSG00000030724	1	0	0	0	0	0	0	0	0
ENSMUSG00000030725	47	68	83	64	75	97	103	115	66
ENSMUSG00000030722	500	486	576	405	434	473	446	441	303
ENSMUSG00000030720	123	128	161	146	155	170	179	233	144
ENSMUSG00000005779	3942	3567	3940	6999	6933	7427	6803	7454	5104
ENSMUSG00000029725	46	78	78	139	154	142	157	172	99
ENSMUSG00000029726	1302	1320	1493	1530	1509	1822	1878	1950	1439
ENSMUSG00000029727	3	13	9	6	7	3	12	10	9
ENSMUSG00000029720	0	0	0	0	0	0	0	0	0
ENSMUSG00000029722	774	831	792	891	1009	989	1142	1170	729
ENSMUSG00000005774	596	526	599	490	549	720	603	612	379
ENSMUSG00000029723	878	934	980	852	932	894	1155	1099	1214
ENSMUSG00000030717	399	413	507	807	835	1211	960	1048	1049
ENSMUSG00000029729	1857	1867	1989	901	1069	1165	1096	1207	805
ENSMUSG00000030718	1927	1853	2179	2048	2353	2382	2627	2663	1898
ENSMUSG00000030713	0	0	0	0	0	0	0	1	0
ENSMUSG00000030714	442	442	566	399	448	433	398	519	462
ENSMUSG00000030711	1	1	0	0	1	0	0	1	0
ENSMUSG00000088086	2	2	12	0	0	3	2	1	0
ENSMUSG00000088088	0	0	0	0	0	0	0	0	0
ENSMUSG00000088083	0	0	0	0	0	0	0	0	0
ENSMUSG00000088084	0	0	0	0	0	0	0	0	0
ENSMUSG00000088085	0	0	0	0	0	0	0	0	0
ENSMUSG00000088075	9	7	7	4	0	8	4	2	2
ENSMUSG00000088076	0	0	0	0	0	0	0	0	0
ENSMUSG00000088077	0	0	0	0	0	0	0	0	0
ENSMUSG00000088070	0	0	0	0	0	0	0	0	0
ENSMUSG00000088071	3	1	2	8	2	6	5	9	3
ENSMUSG00000088073	0	0	0	0	0	0	0	0	0
ENSMUSG00000088097	0	0	0	0	0	0	0	0	0
ENSMUSG00000088098	0	0	0	0	0	0	0	0	0
ENSMUSG00000088099	0	0	0	0	0	0	0	0	0
ENSMUSG00000088090	0	0	0	0	0	0	0	0	0
ENSMUSG00000088091	0	0	0	0	0	0	0	0	0
ENSMUSG00000088093	0	0	0	0	0	0	0	0	0
ENSMUSG00000088094	0	0	0	0	0	0	0	0	0
ENSMUSG00000088095	0	0	0	0	0	0	0	0	0
ENSMUSG00000088096	0	0	0	0	0	0	0	0	0
ENSMUSG00000088043	0	0	0	0	0	0	0	0	0
ENSMUSG00000088044	0	0	0	0	0	0	0	0	0
ENSMUSG00000088045	0	0	0	0	0	0	0	0	0
ENSMUSG00000088046	0	0	0	0	0	0	0	0	0
ENSMUSG00000088047	0	0	0	0	0	0	0	0	0
ENSMUSG00000088048	0	0	0	0	0	0	0	0	0
ENSMUSG00000005705	1	2	8	2	5	2	4	2	3
ENSMUSG00000088049	0	2	0	0	0	0	1	0	0
ENSMUSG00000088040	0	0	0	0	0	0	0	0	0
ENSMUSG00000088041	0	0	0	0	0	0	0	0	0
ENSMUSG00000088039	0	0	0	0	0	0	0	0	0
ENSMUSG00000088031	0	0	0	0	0	0	0	0	0
ENSMUSG00000064084	0	0	0	0	0	0	0	0	0
ENSMUSG00000005718	212	235	291	145	141	176	131	179	173
ENSMUSG00000088036	0	0	0	0	0	0	0	0	0
ENSMUSG00000088037	16	32	15	1	3	2	1	1	4
ENSMUSG00000005716	0	0	0	0	0	0	0	0	0
ENSMUSG00000064080	13875	13308	15653	13193	14789	16964	15340	16805	13108
ENSMUSG00000064081	0	0	0	0	0	0	0	0	0
ENSMUSG00000088030	0	0	0	0	0	0	0	0	0
ENSMUSG00000088064	0	0	0	0	0	0	0	0	0
ENSMUSG00000088066	3	5	8	0	0	1	1	1	1
ENSMUSG00000088067	0	0	0	0	0	0	0	0	0
ENSMUSG00000088068	0	1	0	0	0	0	0	0	0
ENSMUSG00000088069	0	0	0	0	0	0	0	0	0
ENSMUSG00000064090	622	556	688	435	499	603	603	622	425
ENSMUSG00000088060	0	0	0	0	0	0	0	0	0
ENSMUSG00000088062	0	0	0	0	3	0	0	1	0
ENSMUSG00000088063	0	0	0	0	0	0	0	0	0
ENSMUSG00000088054	5	3	4	1	1	2	0	4	1
ENSMUSG00000088055	0	0	0	0	0	0	0	0	0
ENSMUSG00000088056	0	0	0	0	0	0	0	0	0
ENSMUSG00000088057	0	0	0	0	0	0	0	0	0
ENSMUSG00000088058	0	0	0	0	1	1	0	1	1
ENSMUSG00000088059	0	0	0	0	0	0	0	0	0
ENSMUSG00000088050	0	0	0	0	0	0	0	0	0
ENSMUSG00000088051	0	0	0	0	0	0	0	0	0
ENSMUSG00000088052	0	0	0	0	0	0	0	0	0
ENSMUSG00000113530	0	0	0	0	0	0	0	0	0
ENSMUSG00000113531	0	0	0	0	0	0	0	0	0
ENSMUSG00000113532	0	0	0	0	0	0	0	0	0
ENSMUSG00000113533	0	0	0	0	0	0	0	0	0
ENSMUSG00000113534	0	0	0	0	0	0	0	0	0
ENSMUSG00000113535	0	0	0	0	0	0	0	0	0
ENSMUSG00000113536	25	14	19	12	18	16	11	10	6
ENSMUSG00000088128	39	32	23	4	2	2	7	2	8
ENSMUSG00000064158	1	2	0	1	1	1	4	0	0
ENSMUSG00000040189	3	1	0	0	0	2	2	5	3
ENSMUSG00000039196	1	2	0	0	0	0	0	1	1
ENSMUSG00000039197	1051	952	1146	810	875	952	987	1063	787
ENSMUSG00000039194	1	4	3	4	2	2	4	2	5
ENSMUSG00000040187	178	144	161	67	67	87	83	96	53
ENSMUSG00000088121	0	0	0	0	0	0	0	0	0
ENSMUSG00000039195	97	132	140	158	165	128	178	190	231
ENSMUSG00000040188	579	563	618	512	559	603	694	774	545
ENSMUSG00000088122	0	0	0	0	0	0	0	0	0
ENSMUSG00000040181	2	2	1	1	3	3	1	0	3
ENSMUSG00000064156	0	0	0	0	0	0	0	0	0
ENSMUSG00000088123	0	0	0	0	0	0	0	0	0
ENSMUSG00000088124	0	0	0	0	0	0	0	0	0
ENSMUSG00000039198	0	0	0	0	0	0	0	0	0
ENSMUSG00000040183	37	29	35	24	14	11	22	24	15
ENSMUSG00000088125	0	0	0	0	0	0	0	0	0
ENSMUSG00000039199	620	630	655	310	337	342	376	388	258
ENSMUSG00000088126	0	0	0	0	0	0	0	0	0
ENSMUSG00000113537	1	0	0	0	0	0	0	0	0
ENSMUSG00000113538	0	0	0	0	0	0	0	0	0
ENSMUSG00000113539	0	0	0	0	0	0	0	0	0
ENSMUSG00000078793	0	0	0	0	0	0	0	0	0
ENSMUSG00000113540	64	82	74	4	7	8	12	9	3
ENSMUSG00000078794	46	51	47	81	61	70	82	71	41
ENSMUSG00000113541	0	0	0	0	0	0	0	0	0
ENSMUSG00000113542	0	0	0	0	0	0	0	0	0
ENSMUSG00000113543	0	0	0	0	0	0	0	0	0
ENSMUSG00000113544	0	0	0	0	0	0	0	0	0
ENSMUSG00000078798	0	0	0	0	0	0	0	0	0
ENSMUSG00000113545	0	0	0	0	0	0	0	0	0
ENSMUSG00000078795	0	0	0	0	0	0	0	0	0
ENSMUSG00000113546	0	0	0	0	0	0	0	0	0
ENSMUSG00000078796	0	0	0	0	0	0	0	0	0
ENSMUSG00000113547	0	0	0	0	0	0	0	0	0
ENSMUSG00000088116	0	0	0	0	0	0	0	0	0
ENSMUSG00000088118	13	6	10	0	0	2	0	1	0
ENSMUSG00000088119	27	25	28	6	6	7	1	9	1
ENSMUSG00000039193	0	1	0	0	0	0	0	0	0
ENSMUSG00000039191	4132	4103	4428	2295	2381	3088	2571	2318	1355
ENSMUSG00000040174	632	607	669	421	415	482	504	495	435
ENSMUSG00000039183	811	854	903	1043	1174	1254	1232	1304	968
ENSMUSG00000040177	613	620	763	249	308	328	359	394	304
ENSMUSG00000088111	0	0	0	0	0	0	0	0	0
ENSMUSG00000040170	0	0	1	0	0	0	0	0	0
ENSMUSG00000088112	0	0	0	0	0	0	0	0	0
ENSMUSG00000088113	7	5	3	0	0	0	0	0	0
ENSMUSG00000039187	1436	1375	1479	1281	1275	1588	1538	1577	950
ENSMUSG00000064165	0	0	0	0	0	0	0	0	0
ENSMUSG00000088114	8	3	3	0	0	0	0	0	0
ENSMUSG00000088115	0	0	0	0	0	0	0	0	0
ENSMUSG00000113548	0	0	0	0	0	0	0	0	0
ENSMUSG00000113549	0	0	0	0	0	0	0	0	0
ENSMUSG00000078799	0	0	0	0	0	0	0	0	0
ENSMUSG00000113551	0	0	0	0	0	0	0	0	0
ENSMUSG00000113552	0	0	0	0	0	0	0	0	0
ENSMUSG00000113553	0	0	0	0	0	0	0	0	0
ENSMUSG00000113554	0	0	0	0	0	0	0	0	0
ENSMUSG00000113555	1	2	0	1	0	1	1	3	3
ENSMUSG00000113556	0	0	0	0	0	0	0	0	0
ENSMUSG00000113557	40	44	41	3	0	4	6	4	3
ENSMUSG00000113558	0	0	0	0	0	0	0	0	0
ENSMUSG00000088149	0	0	0	0	0	0	0	0	0
ENSMUSG00000040167	884	791	1015	566	675	694	710	718	460
ENSMUSG00000039182	248	231	296	228	234	266	273	346	272
ENSMUSG00000113550	0	0	0	0	0	0	0	0	0
ENSMUSG00000039174	0	0	0	0	0	0	0	0	0
ENSMUSG00000040163	1	0	0	0	0	0	0	0	0
ENSMUSG00000088141	0	1	0	0	0	0	0	0	0
ENSMUSG00000040164	0	0	0	0	0	0	0	2	0
ENSMUSG00000040165	0	2	0	1	0	1	0	1	1
ENSMUSG00000088143	0	0	0	0	0	0	0	0	0
ENSMUSG00000088144	0	0	0	0	0	0	0	0	0
ENSMUSG00000039178	943	902	958	658	777	779	686	794	547
ENSMUSG00000088145	0	0	0	0	0	0	0	0	0
ENSMUSG00000039179	0	0	0	0	0	0	0	0	0
ENSMUSG00000064179	0	0	0	0	0	2	0	0	0
ENSMUSG00000088146	0	0	0	0	0	0	0	0	0
ENSMUSG00000039176	2482	2386	2686	2040	2223	2423	2441	2800	1905
ENSMUSG00000088147	0	0	0	0	0	0	0	0	0
ENSMUSG00000064177	5	4	0	2	0	1	0	0	0
ENSMUSG00000088148	0	0	0	0	3	0	0	0	0
ENSMUSG00000113559	0	0	0	0	0	0	0	0	0
ENSMUSG00000113562	0	0	0	0	0	0	0	0	0
ENSMUSG00000113563	0	0	0	0	0	0	0	0	0
ENSMUSG00000113564	0	0	0	0	0	0	0	0	0
ENSMUSG00000113565	0	0	0	0	0	0	0	0	0
ENSMUSG00000113566	1	1	0	0	0	0	0	0	1
ENSMUSG00000113567	0	0	0	0	0	0	0	0	0
ENSMUSG00000113568	0	0	0	0	0	0	0	0	0
ENSMUSG00000113569	0	0	0	0	0	0	0	0	0
ENSMUSG00000088138	0	0	0	0	0	0	0	0	0
ENSMUSG00000088139	0	0	0	0	0	0	0	0	0
ENSMUSG00000040158	336	331	409	409	495	535	503	570	419
ENSMUSG00000113560	0	0	0	0	0	0	0	0	0
ENSMUSG00000113561	0	0	0	0	0	0	0	0	0
ENSMUSG00000039163	144	127	167	200	229	230	218	251	165
ENSMUSG00000040152	7910	7018	8822	3898	4033	4023	4271	4454	3566
ENSMUSG00000039164	218	279	329	285	304	308	361	402	247
ENSMUSG00000040154	0	0	0	0	0	0	0	0	0
ENSMUSG00000088132	0	0	0	0	0	0	0	0	0
ENSMUSG00000088133	0	0	0	0	0	0	0	0	0
ENSMUSG00000039167	3	0	1	0	1	1	3	0	0
ENSMUSG00000088134	0	0	0	0	0	0	0	0	0
ENSMUSG00000039168	2066	2111	2330	2561	2845	2900	3627	3704	2928
ENSMUSG00000088135	0	0	0	0	0	0	0	0	0
ENSMUSG00000088136	0	0	0	0	0	0	0	0	0
ENSMUSG00000039166	185	197	193	140	154	252	189	200	124
ENSMUSG00000040151	2229	2275	2691	1325	1688	1806	1843	1876	1363
ENSMUSG00000064181	1075	935	1080	1110	1065	1181	1268	1435	1032
ENSMUSG00000054793	26	23	32	47	30	40	47	40	26
ENSMUSG00000113573	0	0	0	0	0	0	0	0	0
ENSMUSG00000113574	0	0	0	0	0	0	0	0	0
ENSMUSG00000113575	0	0	0	0	0	0	0	0	0
ENSMUSG00000113576	0	0	0	0	0	0	0	0	0
ENSMUSG00000113577	54	53	69	7	3	9	6	9	2
ENSMUSG00000078765	0	0	0	2	2	1	1	0	1
ENSMUSG00000113578	0	0	0	0	0	0	0	0	0
ENSMUSG00000078762	62	109	91	43	68	88	88	77	79
ENSMUSG00000113579	0	0	0	0	0	0	0	0	0
ENSMUSG00000054792	396	391	463	278	321	356	404	395	373
ENSMUSG00000078763	0	0	1	1	1	2	0	0	0
ENSMUSG00000064115	0	3	0	4	2	1	0	0	0
ENSMUSG00000113570	1	1	1	1	3	2	1	3	3
ENSMUSG00000113571	16	22	29	1	0	2	4	2	3
ENSMUSG00000113572	0	0	0	0	0	0	0	0	0
ENSMUSG00000064110	0	0	0	0	0	0	0	0	0
ENSMUSG00000078768	152	130	161	83	101	112	92	121	105
ENSMUSG00000113584	0	0	0	1	3	0	2	6	1
ENSMUSG00000113585	48	43	62	35	36	29	46	38	26
ENSMUSG00000113586	0	0	0	0	0	0	0	0	0
ENSMUSG00000113587	1	1	1	0	1	0	0	0	0
ENSMUSG00000078753	0	0	0	0	0	0	0	0	0
ENSMUSG00000113588	0	0	0	0	0	0	0	0	0
ENSMUSG00000078754	0	0	0	0	0	0	0	0	0
ENSMUSG00000113589	1	0	1	0	4	3	3	3	5
ENSMUSG00000078752	0	0	0	0	0	0	0	0	0
ENSMUSG00000064127	5240	5161	5734	2345	2825	2974	2989	3372	2387
ENSMUSG00000064128	394	418	482	248	313	311	297	354	269
ENSMUSG00000064125	1	3	1	2	1	2	1	0	0
ENSMUSG00000113580	0	1	0	0	0	0	0	1	0
ENSMUSG00000113581	0	0	0	0	0	0	0	0	0
ENSMUSG00000064129	0	0	0	0	0	0	0	0	0
ENSMUSG00000113582	2	0	0	0	0	0	0	0	0
ENSMUSG00000113583	0	0	0	0	0	0	0	0	0
ENSMUSG00000064120	435	402	465	342	386	460	422	410	301
ENSMUSG00000064121	0	0	0	0	0	0	0	0	0
ENSMUSG00000078757	0	0	0	0	0	0	0	0	0
ENSMUSG00000078759	0	0	0	0	0	0	0	0	0
ENSMUSG00000113595	0	0	0	0	0	0	0	0	0
ENSMUSG00000078783	0	0	0	0	0	0	0	0	0
ENSMUSG00000113596	0	0	0	0	0	0	0	0	0
ENSMUSG00000078780	0	0	0	0	0	0	0	0	0
ENSMUSG00000113597	0	0	0	0	0	0	0	0	0
ENSMUSG00000113598	0	0	0	0	0	0	0	0	0
ENSMUSG00000078786	245	273	294	154	158	175	205	231	179
ENSMUSG00000113599	0	0	0	0	0	0	0	0	0
ENSMUSG00000078787	0	0	0	0	0	0	0	0	0
ENSMUSG00000078784	521	572	593	665	810	757	757	766	814
ENSMUSG00000064138	682	668	815	572	531	650	616	646	460
ENSMUSG00000088105	0	0	0	0	0	0	0	0	0
ENSMUSG00000088106	0	0	0	0	0	0	0	0	0
ENSMUSG00000064137	0	0	0	0	0	0	0	0	0
ENSMUSG00000088108	46	64	82	44	32	40	39	52	49
ENSMUSG00000113590	0	0	0	0	0	0	0	0	0
ENSMUSG00000113591	1	0	1	0	0	1	0	0	0
ENSMUSG00000113592	0	0	0	0	0	0	0	0	0
ENSMUSG00000113593	0	0	0	0	0	0	0	0	0
ENSMUSG00000113594	0	0	0	0	0	0	0	0	0
ENSMUSG00000088102	1	2	1	0	1	0	0	0	0
ENSMUSG00000088103	0	0	0	0	0	0	0	0	0
ENSMUSG00000088104	0	0	0	0	0	0	0	0	0
ENSMUSG00000078789	200	209	224	154	176	179	178	199	165
ENSMUSG00000078771	10	6	13	2	9	17	15	7	10
ENSMUSG00000078772	6	13	14	1	6	5	2	0	0
ENSMUSG00000078776	16	9	13	14	4	13	17	15	14
ENSMUSG00000078773	1219	1194	1402	703	703	747	813	821	619
ENSMUSG00000064147	0	0	0	2	0	0	0	0	0
ENSMUSG00000064141	67	87	86	57	45	50	57	57	61
ENSMUSG00000040197	0	0	0	0	0	0	0	0	0
ENSMUSG00000064140	1	1	0	0	0	4	0	2	1
ENSMUSG00000064145	1435	1365	1595	1185	1333	1363	1439	1452	1050
ENSMUSG00000040195	983	1007	1124	710	715	1014	844	776	551
ENSMUSG00000078779	293	245	312	267	281	343	288	324	235
ENSMUSG00000030782	952	936	1141	742	880	861	1020	1145	918
ENSMUSG00000030780	480	470	514	362	381	425	389	423	385
ENSMUSG00000030781	0	0	0	0	0	0	0	0	0
ENSMUSG00000054752	81	49	60	19	15	34	28	18	7
ENSMUSG00000029790	447	475	536	416	448	514	472	524	318
ENSMUSG00000078721	0	0	0	0	0	0	0	0	0
ENSMUSG00000040105	138	174	155	190	204	233	199	186	121
ENSMUSG00000029797	1	4	1	7	3	4	2	3	0
ENSMUSG00000029798	590	491	630	695	632	905	479	341	178
ENSMUSG00000040102	1093	1115	1269	591	670	616	694	832	486
ENSMUSG00000015143	6745	6437	7717	5227	5808	6142	6611	7099	5824
ENSMUSG00000039110	0	2	2	0	0	0	0	1	1
ENSMUSG00000015149	771	779	829	997	1009	1193	1184	1226	967
ENSMUSG00000039116	136	137	151	116	107	117	105	79	56
ENSMUSG00000054757	1	0	2	0	0	1	0	0	0
ENSMUSG00000039117	851	860	993	542	607	666	719	715	469
ENSMUSG00000030788	1282	1284	1472	1057	1275	1432	1345	1342	915
ENSMUSG00000039114	1050	975	1269	518	726	672	788	1026	990
ENSMUSG00000054759	0	0	0	0	0	0	0	0	0
ENSMUSG00000078722	0	0	0	0	0	0	0	0	0
ENSMUSG00000030789	0	0	0	0	0	0	0	2	0
ENSMUSG00000039115	0	0	1	0	0	0	0	0	0
ENSMUSG00000030786	0	0	1	0	0	0	0	0	0
ENSMUSG00000054753	28	36	28	9	10	10	17	16	9
ENSMUSG00000030787	0	0	1	0	0	0	0	0	0
ENSMUSG00000030785	3	3	3	5	11	26	7	5	0
ENSMUSG00000029782	2556	2953	3151	2218	2448	2866	2597	2951	2408
ENSMUSG00000030771	2	1	2	0	0	0	0	0	0
ENSMUSG00000030772	1622	1492	1729	2253	2221	2760	2583	2213	1396
ENSMUSG00000029784	8	18	15	14	19	23	15	27	12
ENSMUSG00000030770	7325	7025	8101	6185	6873	7313	7866	8195	5971
ENSMUSG00000054763	0	0	0	0	0	0	0	0	0
ENSMUSG00000029780	623	594	690	544	741	815	738	830	565
ENSMUSG00000029781	3829	3508	4170	4132	4265	4861	4857	5201	3785
ENSMUSG00000029787	1755	1517	1835	1052	1016	1285	1159	1195	798
ENSMUSG00000029788	0	0	0	0	0	0	0	0	0
ENSMUSG00000078719	0	0	0	0	0	0	0	0	0
ENSMUSG00000039100	5016	4621	5431	2941	3268	3556	3553	3656	2355
ENSMUSG00000030779	3595	3723	4391	1671	1962	1896	2100	2199	1925
ENSMUSG00000039105	858	776	1013	1167	1313	1472	1292	1155	996
ENSMUSG00000078713	556	532	671	671	773	808	890	1006	1008
ENSMUSG00000039106	0	0	0	0	0	0	0	0	0
ENSMUSG00000039103	83	81	79	50	49	55	46	57	54
ENSMUSG00000030775	1	0	0	0	0	0	0	0	0
ENSMUSG00000039109	2	3	9	2	0	1	0	3	3
ENSMUSG00000054764	0	0	1	0	0	0	0	0	0
ENSMUSG00000054766	5554	5686	6812	4470	5304	5705	5199	5953	4312
ENSMUSG00000030774	1999	1906	2221	1689	1915	2161	2329	2253	1764
ENSMUSG00000039108	1683	1580	1956	1392	1536	1853	1863	1818	1356
ENSMUSG00000078716	97	118	138	71	84	91	104	92	66
ENSMUSG00000029771	14	14	8	26	22	30	23	16	15
ENSMUSG00000030760	1164	1123	1390	751	971	982	872	1009	586
ENSMUSG00000029772	1990	2011	2387	1363	1446	1651	1457	1639	1145
ENSMUSG00000030761	4208	4010	4411	3233	3559	4005	3745	4310	2931
ENSMUSG00000078742	0	0	0	0	0	0	0	0	0
ENSMUSG00000054770	410	397	471	281	311	332	383	343	252
ENSMUSG00000029775	3114	3209	3445	2220	2417	2580	2518	2654	1837
ENSMUSG00000029776	1035	969	1131	1000	1184	1312	1231	1353	1033
ENSMUSG00000029777	9156	8626	9965	12156	12832	15478	12037	14193	9761
ENSMUSG00000029778	0	0	1	0	0	0	0	0	0
ENSMUSG00000015120	3507	3572	4134	2378	2865	3042	3031	3490	2764
ENSMUSG00000015127	385	378	433	257	211	232	222	254	187
ENSMUSG00000030768	1514	1387	1675	1049	1049	1224	1200	1397	1060
ENSMUSG00000054779	0	0	0	0	0	0	2	0	0
ENSMUSG00000078746	0	0	0	0	0	0	0	0	0
ENSMUSG00000030769	0	0	0	0	0	0	1	0	0
ENSMUSG00000078747	0	0	0	0	0	0	0	0	0
ENSMUSG00000030766	1528	1626	1705	1019	1163	1201	1309	1378	837
ENSMUSG00000030762	3	1	0	6	1	1	4	1	0
ENSMUSG00000015126	246	226	281	307	270	362	403	402	359
ENSMUSG00000030763	386	353	404	490	522	563	526	616	453
ENSMUSG00000029761	14178	13228	16444	8982	10976	10947	11244	11033	9063
ENSMUSG00000030750	898	938	949	1326	1327	1560	1531	1603	1126
ENSMUSG00000029762	1442	1435	1606	1621	1678	2017	2287	2270	1871
ENSMUSG00000029763	2915	2672	3160	1777	1814	2149	2111	2327	1759
ENSMUSG00000064105	145	127	111	144	129	146	172	147	107
ENSMUSG00000029769	1288	1284	1403	864	799	950	965	911	777
ENSMUSG00000064109	0	0	0	0	0	0	0	0	0
ENSMUSG00000029765	0	0	0	1	0	0	0	1	0
ENSMUSG00000029766	0	0	0	0	0	0	0	0	0
ENSMUSG00000029767	15540	15266	17510	16415	17552	20747	18892	18857	13800
ENSMUSG00000015133	6149	5727	6529	4314	4198	4825	5113	5338	3954
ENSMUSG00000030759	4641	4091	5191	2247	2706	2766	2837	2860	2191
ENSMUSG00000030757	0	0	0	0	0	0	0	0	0
ENSMUSG00000078735	0	1	0	0	0	0	0	1	0
ENSMUSG00000015134	7	4	1	0	5	0	8	5	6
ENSMUSG00000030753	3578	3470	4247	2945	3477	3461	4062	4383	3048
ENSMUSG00000030754	4492	4239	5199	4223	4803	5332	5191	5614	3750
ENSMUSG00000030751	3781	3557	4220	4562	5313	5890	5234	5761	4086
ENSMUSG00000078737	0	0	0	0	0	0	0	0	0
ENSMUSG00000030752	242	218	253	193	237	159	214	265	164
ENSMUSG00000040146	87	85	102	110	111	136	103	127	96
ENSMUSG00000040147	0	0	0	0	0	0	0	0	0
ENSMUSG00000040148	0	0	0	0	0	0	0	0	0
ENSMUSG00000039153	1367	1426	1631	535	631	616	634	680	566
ENSMUSG00000039156	1217	1208	1414	805	935	1024	1071	1148	906
ENSMUSG00000054717	1845	1702	2155	1512	1772	1676	1903	2006	1967
ENSMUSG00000039157	378	377	448	291	347	317	359	383	312
ENSMUSG00000039154	2	4	7	1	3	5	8	4	3
ENSMUSG00000039155	23	14	27	18	20	19	10	15	13
ENSMUSG00000040140	5	2	4	0	1	0	2	0	1
ENSMUSG00000039158	264	295	310	197	201	264	243	245	155
ENSMUSG00000054715	341	332	410	298	285	351	325	373	304
ENSMUSG00000039159	2685	2676	3112	2009	2333	2507	2597	2514	1711
ENSMUSG00000054716	183	195	179	192	207	194	263	264	237
ENSMUSG00000015189	1566	1629	1716	1082	1286	1378	1420	1480	870
ENSMUSG00000113500	0	0	0	0	0	0	0	0	0
ENSMUSG00000113501	0	0	0	0	0	0	0	0	0
ENSMUSG00000113502	0	0	0	0	0	0	0	0	0
ENSMUSG00000113503	0	0	0	0	0	0	0	0	0
ENSMUSG00000040138	0	0	0	0	0	0	0	0	0
ENSMUSG00000040139	123	161	155	64	86	88	113	74	69
ENSMUSG00000040134	0	0	0	0	0	0	0	0	0
ENSMUSG00000040136	5	4	5	4	6	2	1	3	1
ENSMUSG00000040132	0	0	0	0	0	0	0	0	0
ENSMUSG00000040133	307	314	356	296	323	417	390	362	208
ENSMUSG00000039145	1025	1085	1160	603	632	683	732	711	513
ENSMUSG00000054728	175	188	169	179	175	207	194	207	106
ENSMUSG00000039146	3	1	1	1	1	0	8	2	0
ENSMUSG00000113504	2	0	0	0	0	2	0	1	1
ENSMUSG00000113505	0	0	0	0	0	0	0	0	0
ENSMUSG00000113506	0	0	0	0	0	0	0	0	0
ENSMUSG00000039148	1259	1212	1385	897	953	945	1133	1237	1311
ENSMUSG00000054727	1	0	0	0	0	0	0	0	0
ENSMUSG00000113507	0	0	0	0	0	0	0	0	0
ENSMUSG00000054720	1555	1592	1726	1102	1224	1345	1323	1331	948
ENSMUSG00000113508	0	0	0	0	0	0	0	0	0
ENSMUSG00000113509	0	0	0	0	0	0	0	0	0
ENSMUSG00000054723	114	131	159	170	165	222	265	263	162
ENSMUSG00000113510	0	0	0	0	0	0	0	0	0
ENSMUSG00000113511	44	23	54	3	0	3	6	7	3
ENSMUSG00000113512	0	0	0	0	0	0	0	0	0
ENSMUSG00000113513	0	0	0	0	0	0	0	0	0
ENSMUSG00000113514	1	1	0	0	0	0	0	0	0
ENSMUSG00000040127	0	0	0	0	0	0	0	0	0
ENSMUSG00000040128	644	815	811	1884	2028	2593	2558	2336	1599
ENSMUSG00000040123	843	785	1025	431	490	576	494	570	417
ENSMUSG00000040124	604	532	686	397	530	497	490	511	369
ENSMUSG00000040125	0	0	0	0	0	0	0	0	0
ENSMUSG00000039130	1051	947	1049	1208	1408	1501	1320	1548	1100
ENSMUSG00000039131	1	2	1	1	1	1	0	2	1
ENSMUSG00000015165	10844	11223	12488	8120	8778	9602	9920	10795	7850
ENSMUSG00000040121	30	46	35	12	14	15	11	17	13
ENSMUSG00000039133	0	0	0	0	0	0	0	0	0
ENSMUSG00000039138	0	0	0	0	0	0	0	0	0
ENSMUSG00000113515	19	31	10	7	12	4	11	9	3
ENSMUSG00000113516	0	0	0	0	0	0	0	0	0
ENSMUSG00000054737	465	379	472	198	238	248	205	212	143
ENSMUSG00000078700	128	141	178	106	102	85	112	106	93
ENSMUSG00000113517	0	0	0	0	0	0	0	0	0
ENSMUSG00000039137	273	322	313	224	222	225	262	265	199
ENSMUSG00000113518	0	0	0	0	0	0	0	0	0
ENSMUSG00000078706	0	0	0	0	0	0	0	0	1
ENSMUSG00000113519	22	26	29	7	7	6	13	12	5
ENSMUSG00000054733	82	69	85	75	89	97	89	104	76
ENSMUSG00000030793	0	0	2	0	0	0	0	0	0
ENSMUSG00000113520	0	0	0	0	0	0	0	0	0
ENSMUSG00000030792	0	0	0	1	0	0	0	0	1
ENSMUSG00000113521	2	2	5	3	2	5	5	7	1
ENSMUSG00000113522	0	0	0	0	0	0	0	0	0
ENSMUSG00000030790	1	0	0	4	5	3	9	3	3
ENSMUSG00000113523	0	0	0	0	0	0	0	0	0
ENSMUSG00000113524	0	0	0	0	0	0	0	0	0
ENSMUSG00000040118	1538	1429	1793	679	855	892	896	900	633
ENSMUSG00000040112	509	504	553	456	540	645	576	662	470
ENSMUSG00000040113	1	1	0	0	0	0	0	0	0
ENSMUSG00000015176	2177	2084	2605	1873	2171	2075	2223	2675	2553
ENSMUSG00000040111	431	419	418	333	344	371	348	371	196
ENSMUSG00000054746	0	0	0	0	0	0	0	0	0
ENSMUSG00000113526	0	0	0	0	0	0	0	0	0
ENSMUSG00000039128	1785	1600	1891	1597	1873	2055	1917	2118	1735
ENSMUSG00000113527	3	1	4	2	4	8	3	4	4
ENSMUSG00000113528	22	24	24	39	56	49	52	43	41
ENSMUSG00000039126	6356	6030	6554	2627	2448	3153	3548	3127	2047
ENSMUSG00000113529	15	17	16	24	25	43	20	47	24
ENSMUSG00000030798	0	3	1	0	1	0	1	0	0
ENSMUSG00000030795	6716	6536	8192	3194	3494	3936	4094	4368	3612
ENSMUSG00000030796	1466	1553	1782	2065	2185	2447	2452	2719	1704
ENSMUSG00000054745	0	0	0	0	0	0	0	1	0
ENSMUSG00000005625	2758	2624	3090	3232	3463	3847	3543	4068	3503
ENSMUSG00000005621	1418	1469	1604	890	1047	1092	1073	1215	899
ENSMUSG00000005628	24	20	31	10	11	11	14	18	12
ENSMUSG00000005609	2304	2313	2687	2174	2420	2547	2689	2831	2049
ENSMUSG00000005615	2253	2332	2551	1881	2097	2214	2345	2376	1758
ENSMUSG00000005610	30223	28906	34838	24407	30486	30421	30280	35066	27540
ENSMUSG00000005611	5	6	3	3	2	1	6	3	5
ENSMUSG00000029630	0	0	0	0	0	0	0	0	0
ENSMUSG00000029636	0	0	1	0	0	0	0	0	0
ENSMUSG00000005667	2600	2496	2947	3354	3333	4585	3155	3651	2848
ENSMUSG00000029638	52	41	49	48	45	53	53	53	42
ENSMUSG00000029632	1253	1368	1608	1787	2162	2202	2320	2451	2212
ENSMUSG00000029633	3	2	3	3	0	3	2	2	4
ENSMUSG00000029634	1715	1501	1811	1165	1270	1293	1509	1508	1366
ENSMUSG00000029635	1937	1753	2247	879	1143	1121	1049	1282	1042
ENSMUSG00000030629	1279	1106	1462	1209	1299	1461	1281	1251	843
ENSMUSG00000030623	0	0	2	0	0	0	0	0	0
ENSMUSG00000030621	294	303	347	190	193	237	167	199	130
ENSMUSG00000005672	0	0	0	0	0	0	0	0	0
ENSMUSG00000029620	0	0	0	0	0	0	0	0	0
ENSMUSG00000029625	1037	993	1191	721	849	876	941	953	707
ENSMUSG00000029627	34	43	46	73	48	99	66	67	61
ENSMUSG00000029621	1749	1706	1971	2091	2169	2307	2388	2602	1853
ENSMUSG00000005677	7	2	0	0	1	3	2	1	0
ENSMUSG00000029622	3516	3421	3799	4033	4134	4406	4866	4985	4474
ENSMUSG00000005674	401	442	509	586	588	669	642	751	571
ENSMUSG00000029623	1561	1882	1953	1519	1832	1859	2059	2159	1878
ENSMUSG00000029624	565	559	684	645	751	874	774	916	680
ENSMUSG00000029629	1925	1700	2338	973	1116	1171	1241	1287	998
ENSMUSG00000030619	1035	1076	1384	816	958	1070	1046	1112	976
ENSMUSG00000030616	3166	3086	3619	1426	1601	1896	1873	2259	1894
ENSMUSG00000030617	0	0	0	4	0	0	1	0	1
ENSMUSG00000030614	297	256	339	331	402	445	410	386	309
ENSMUSG00000030615	574	624	740	981	1076	1177	1057	1190	808
ENSMUSG00000030612	272	236	319	333	365	358	401	451	405
ENSMUSG00000030613	454	433	505	520	526	614	610	683	424
ENSMUSG00000030610	410	400	438	315	335	408	393	393	326
ENSMUSG00000030611	508	478	584	631	741	761	753	806	712
ENSMUSG00000005640	0	0	1	0	0	0	0	0	0
ENSMUSG00000029614	7443	7241	8444	9330	10269	11289	10935	12718	12752
ENSMUSG00000029616	1135	1004	1211	1337	1451	1469	1537	1701	1348
ENSMUSG00000029617	1319	1218	1503	1304	1506	1596	1546	1697	1382
ENSMUSG00000029610	991	1055	1131	1209	1278	1280	1441	1433	1445
ENSMUSG00000029613	1094	1114	1202	1050	1190	1195	1292	1337	935
ENSMUSG00000030609	1090	1009	1202	628	715	615	724	1008	803
ENSMUSG00000029618	0	0	0	0	0	1	0	0	0
ENSMUSG00000030607	0	0	0	0	0	0	1	0	1
ENSMUSG00000005649	0	1	6	1	0	0	0	1	2
ENSMUSG00000030605	3468	3400	3921	4269	4226	4870	5357	5475	4609
ENSMUSG00000030606	3	4	6	2	1	0	3	1	2
ENSMUSG00000030603	2702	2433	2785	3324	3605	3807	3695	4341	3397
ENSMUSG00000030604	590	479	542	287	339	341	370	368	261
ENSMUSG00000030602	972	1069	1160	806	862	857	1000	1002	913
ENSMUSG00000030600	3	0	1	0	0	1	0	0	0
ENSMUSG00000029603	0	0	1	0	0	0	1	0	0
ENSMUSG00000005656	1357	1217	1471	1442	1774	1906	1791	1855	1271
ENSMUSG00000029605	275	280	273	697	645	860	591	490	218
ENSMUSG00000029600	118	139	167	225	193	242	241	246	179
ENSMUSG00000029601	4	8	9	2	6	11	3	10	2
ENSMUSG00000029602	1	0	0	0	0	3	2	0	0
ENSMUSG00000029607	23	26	42	7	3	6	6	5	7
ENSMUSG00000029608	0	0	0	0	0	0	0	0	0
ENSMUSG00000113496	0	0	0	0	0	0	0	0	0
ENSMUSG00000113497	0	0	0	0	0	0	0	0	0
ENSMUSG00000113498	0	0	0	0	0	0	0	0	0
ENSMUSG00000113499	0	0	0	0	0	0	0	0	0
ENSMUSG00000113490	0	0	0	0	0	0	0	0	0
ENSMUSG00000113491	0	0	0	0	0	0	0	0	0
ENSMUSG00000113492	0	0	0	0	0	0	0	0	0
ENSMUSG00000113493	0	0	0	0	0	0	0	0	0
ENSMUSG00000113494	0	0	2	0	0	0	0	0	0
ENSMUSG00000113495	1	0	0	0	0	0	0	0	0
ENSMUSG00000078593	0	0	0	0	0	0	0	0	0
ENSMUSG00000078599	0	0	0	0	0	0	0	0	0
ENSMUSG00000078597	0	0	0	0	0	0	0	0	0
ENSMUSG00000078598	0	0	0	0	0	0	0	0	0
ENSMUSG00000078591	0	0	0	0	0	0	0	0	0
ENSMUSG00000078592	5	3	2	7	3	7	7	4	2
ENSMUSG00000078590	0	0	6	3	2	2	0	0	1
ENSMUSG00000078683	0	0	0	0	0	0	0	0	0
ENSMUSG00000078684	1576	1647	1804	949	1070	1176	1301	1324	1055
ENSMUSG00000078681	276	232	227	278	350	373	334	374	264
ENSMUSG00000113410	0	0	0	0	0	0	0	0	0
ENSMUSG00000113411	0	0	0	0	0	0	0	0	0
ENSMUSG00000078687	0	0	0	0	0	0	0	0	0
ENSMUSG00000113412	1	1	1	0	0	0	0	0	0
ENSMUSG00000078688	0	0	0	0	0	0	0	0	0
ENSMUSG00000113413	0	0	0	0	0	0	0	0	0
ENSMUSG00000078685	0	0	0	0	0	0	0	0	0
ENSMUSG00000113414	0	0	0	0	0	0	0	0	0
ENSMUSG00000078686	0	0	0	0	0	0	0	0	0
ENSMUSG00000113415	0	0	0	0	0	0	0	0	0
ENSMUSG00000064039	0	0	0	0	0	0	0	0	0
ENSMUSG00000064037	957	901	1003	824	910	952	908	1088	843
ENSMUSG00000088008	13	11	5	5	3	1	2	2	3
ENSMUSG00000088009	0	0	0	0	0	0	0	0	0
ENSMUSG00000078680	0	0	0	0	0	0	0	0	0
ENSMUSG00000039081	9	7	12	20	18	10	28	24	30
ENSMUSG00000040065	0	0	0	0	0	0	0	0	0
ENSMUSG00000064032	8	11	21	7	7	10	15	12	8
ENSMUSG00000088000	0	0	0	0	0	0	0	0	0
ENSMUSG00000064030	376	336	386	360	376	449	491	538	392
ENSMUSG00000088001	9	3	7	1	1	0	1	0	3
ENSMUSG00000039079	0	1	0	1	0	4	1	1	2
ENSMUSG00000088002	2	1	3	0	0	0	0	0	0
ENSMUSG00000040061	1	1	2	1	1	0	0	4	0
ENSMUSG00000064036	0	1	0	1	0	0	0	0	0
ENSMUSG00000088004	0	2	1	0	9	6	6	2	4
ENSMUSG00000088005	0	0	0	0	0	0	0	0	0
ENSMUSG00000113416	0	0	0	0	0	0	0	0	0
ENSMUSG00000113417	0	0	0	0	0	0	0	0	0
ENSMUSG00000078689	0	0	0	0	0	0	0	0	0
ENSMUSG00000113418	0	0	0	0	0	0	0	0	0
ENSMUSG00000113419	0	0	0	0	0	0	0	0	0
ENSMUSG00000078672	0	0	0	0	0	0	0	0	0
ENSMUSG00000078673	0	0	0	0	0	0	0	0	0
ENSMUSG00000113420	0	0	0	0	0	0	0	0	0
ENSMUSG00000078670	0	0	0	0	0	1	0	0	0
ENSMUSG00000113421	0	0	0	0	0	0	0	0	0
ENSMUSG00000078671	3249	3099	3742	1198	1291	1642	1605	1521	1043
ENSMUSG00000113422	0	0	0	0	0	0	0	0	0
ENSMUSG00000078676	2198	2208	2404	1387	1559	1715	1800	1993	1445
ENSMUSG00000113423	16	12	14	7	4	5	5	4	3
ENSMUSG00000078677	0	0	1	0	1	0	0	0	1
ENSMUSG00000113424	0	0	0	0	0	0	0	0	0
ENSMUSG00000078674	0	0	0	0	0	0	0	0	0
ENSMUSG00000113425	46	64	45	10	4	10	10	4	2
ENSMUSG00000078675	0	0	0	0	0	0	0	0	0
ENSMUSG00000113426	0	0	0	0	0	0	0	0	0
ENSMUSG00000039070	4	2	0	3	0	1	0	2	0
ENSMUSG00000039065	452	420	505	239	229	299	290	342	259
ENSMUSG00000040054	3851	3647	4133	2120	2049	2381	2564	2702	1932
ENSMUSG00000064043	877	920	1002	435	480	476	622	544	384
ENSMUSG00000039062	109	116	132	125	148	178	181	134	94
ENSMUSG00000040055	0	0	0	0	0	0	0	0	0
ENSMUSG00000039063	164	188	194	90	100	121	117	102	91
ENSMUSG00000039068	5351	5449	6000	3021	3307	3970	3532	3956	2833
ENSMUSG00000039069	319	311	344	329	342	364	371	376	315
ENSMUSG00000064044	0	0	0	0	0	0	0	0	0
ENSMUSG00000039067	3872	3762	4547	4060	4644	4827	4902	5473	4646
ENSMUSG00000113427	57	47	61	4	7	9	11	6	7
ENSMUSG00000113428	42	39	64	25	31	23	23	34	7
ENSMUSG00000113429	0	0	0	0	0	0	0	0	0
ENSMUSG00000113430	0	0	0	0	0	0	0	0	0
ENSMUSG00000113431	13	10	8	4	13	7	7	8	6
ENSMUSG00000113432	45	45	62	3	9	10	7	7	8
ENSMUSG00000113433	0	0	0	0	0	0	0	0	0
ENSMUSG00000113434	0	0	0	0	0	0	0	0	0
ENSMUSG00000113435	0	0	0	0	0	0	0	0	0
ENSMUSG00000113436	0	0	0	0	0	0	0	0	0
ENSMUSG00000113437	0	0	0	0	0	0	0	0	0
ENSMUSG00000088028	0	0	0	0	0	0	0	0	0
ENSMUSG00000015090	0	4	4	7	2	4	3	4	1
ENSMUSG00000015092	336	312	341	299	379	319	436	431	558
ENSMUSG00000040046	4	3	4	2	3	1	1	3	5
ENSMUSG00000040048	379	327	404	375	428	422	516	509	612
ENSMUSG00000088020	0	0	0	0	0	0	0	0	0
ENSMUSG00000015087	2333	2301	2723	1936	2119	2340	2551	2672	2188
ENSMUSG00000040043	2968	2981	3193	2462	2539	2869	3038	3002	2290
ENSMUSG00000088021	1	0	2	0	0	0	0	0	0
ENSMUSG00000040044	1594	1709	2021	1593	1857	2111	1894	2070	1345
ENSMUSG00000088022	0	0	0	0	0	0	0	0	0
ENSMUSG00000064052	0	0	2	0	0	0	0	0	0
ENSMUSG00000039057	1	0	3	0	4	0	1	5	1
ENSMUSG00000064057	0	0	0	0	0	0	0	0	0
ENSMUSG00000015083	11	9	5	27	20	34	14	19	11
ENSMUSG00000039058	488	439	517	685	586	754	642	572	347
ENSMUSG00000088025	14	14	19	26	36	33	38	41	18
ENSMUSG00000039055	495	508	629	443	516	501	543	592	559
ENSMUSG00000040040	213	212	287	155	184	232	185	239	165
ENSMUSG00000088026	0	0	0	0	0	0	0	0	0
ENSMUSG00000015085	0	1	1	0	0	0	1	0	0
ENSMUSG00000088027	0	0	0	0	0	0	0	0	0
ENSMUSG00000113438	1	2	3	0	0	0	0	0	0
ENSMUSG00000113439	0	0	0	0	0	0	0	0	0
ENSMUSG00000039059	0	0	1	0	0	0	0	0	0
ENSMUSG00000113441	0	0	1	1	0	0	0	0	1
ENSMUSG00000078695	263	278	330	401	392	408	451	475	510
ENSMUSG00000113442	0	0	0	0	0	0	0	0	0
ENSMUSG00000113443	0	0	0	0	0	0	0	0	0
ENSMUSG00000113444	0	0	0	0	0	0	0	0	0
ENSMUSG00000078698	0	0	0	0	0	0	0	0	0
ENSMUSG00000113445	0	0	0	0	0	0	0	0	0
ENSMUSG00000113446	0	0	0	0	0	0	0	0	0
ENSMUSG00000113447	0	0	4	0	0	2	0	0	0
ENSMUSG00000113448	2	0	0	0	0	0	0	0	0
ENSMUSG00000088017	0	0	0	0	0	0	0	0	0
ENSMUSG00000088018	0	0	0	0	0	0	0	0	0
ENSMUSG00000088019	0	0	0	0	0	0	0	0	0
ENSMUSG00000040035	3	3	11	9	6	6	4	3	3
ENSMUSG00000039050	1045	1047	1194	1006	970	1202	1129	1300	927
ENSMUSG00000078691	0	0	0	0	0	0	1	0	0
ENSMUSG00000040037	62	54	67	41	23	21	41	32	9
ENSMUSG00000113440	26	32	34	42	34	35	34	32	31
ENSMUSG00000039043	1181	1114	1252	1066	1239	1375	1333	1578	1092
ENSMUSG00000064065	0	0	0	0	0	0	0	0	0
ENSMUSG00000088010	1	0	0	1	1	0	0	0	0
ENSMUSG00000040033	825	899	870	2530	2091	2953	1725	1269	624
ENSMUSG00000039041	795	805	880	935	1039	972	1168	1202	1075
ENSMUSG00000040034	926	893	1001	1025	1072	1219	1209	1371	987
ENSMUSG00000064063	0	0	0	0	0	0	0	0	0
ENSMUSG00000015093	0	0	0	0	0	0	0	0	0
ENSMUSG00000039046	2040	1971	2371	1123	1138	1382	1306	1276	1011
ENSMUSG00000064068	539	542	647	642	718	730	773	859	816
ENSMUSG00000015094	827	854	881	1078	1179	1340	1322	1343	1148
ENSMUSG00000039047	2059	1798	1997	1899	1964	2114	1797	1813	1292
ENSMUSG00000088014	20	13	22	1	0	2	1	0	0
ENSMUSG00000015095	883	869	1080	1001	973	1089	1158	1238	945
ENSMUSG00000088015	3	7	5	9	10	18	7	8	6
ENSMUSG00000088016	0	0	0	0	0	0	0	0	0
ENSMUSG00000113449	0	0	0	0	1	2	0	1	0
ENSMUSG00000039048	421	399	438	457	495	584	495	541	411
ENSMUSG00000064061	2441	2273	2754	1119	1342	1373	1251	1315	903
ENSMUSG00000054672	0	0	0	0	0	0	0	0	0
ENSMUSG00000113452	0	0	0	0	0	0	0	0	0
ENSMUSG00000078640	1	0	2	3	9	1	6	3	8
ENSMUSG00000113453	0	0	0	0	0	0	0	0	2
ENSMUSG00000113454	0	0	0	0	0	0	0	0	0
ENSMUSG00000054675	533	527	580	690	721	714	770	882	622
ENSMUSG00000113455	0	1	0	0	0	0	0	0	0
ENSMUSG00000113456	0	0	0	0	0	0	0	0	0
ENSMUSG00000113457	0	0	1	2	2	6	1	4	1
ENSMUSG00000113458	0	0	0	0	0	0	0	0	0
ENSMUSG00000113459	2	0	1	0	1	0	0	0	0
ENSMUSG00000113450	29	18	37	9	13	15	16	14	6
ENSMUSG00000113451	0	0	0	0	0	0	0	0	0
ENSMUSG00000078648	0	0	0	0	0	0	0	0	0
ENSMUSG00000054676	242	224	230	263	300	359	301	363	214
ENSMUSG00000054679	0	0	0	0	0	0	0	0	0
ENSMUSG00000113463	0	0	0	0	0	0	0	0	0
ENSMUSG00000113464	0	0	0	0	0	0	0	0	0
ENSMUSG00000113465	0	0	0	0	0	0	0	0	0
ENSMUSG00000113466	0	0	0	0	0	0	0	0	0
ENSMUSG00000078632	0	0	1	1	0	0	0	0	0
ENSMUSG00000113467	8	2	9	0	2	0	0	2	0
ENSMUSG00000113468	0	0	0	0	0	0	0	0	0
ENSMUSG00000078630	2	0	1	2	0	2	4	2	1
ENSMUSG00000113469	0	0	0	0	0	0	0	0	0
ENSMUSG00000064006	0	0	0	0	0	0	0	0	0
ENSMUSG00000113460	0	0	0	0	0	0	0	0	0
ENSMUSG00000113461	0	0	0	0	0	0	0	0	0
ENSMUSG00000113462	0	0	0	0	1	0	0	0	0
ENSMUSG00000040097	1203	1217	1287	1232	1390	1429	1539	1671	1379
ENSMUSG00000040093	33	23	28	44	16	53	37	27	23
ENSMUSG00000078636	1918	1756	2058	2674	2957	3047	3259	3527	2718
ENSMUSG00000078635	49	47	52	68	58	74	57	54	43
ENSMUSG00000078639	0	0	0	0	0	0	0	0	0
ENSMUSG00000113474	0	0	0	0	0	0	0	0	0
ENSMUSG00000113475	0	0	0	0	0	0	0	0	0
ENSMUSG00000113476	0	0	0	0	0	0	0	0	0
ENSMUSG00000113477	0	0	0	0	0	0	0	0	0
ENSMUSG00000054690	0	0	0	0	0	0	1	0	0
ENSMUSG00000113478	0	0	0	0	0	0	0	0	0
ENSMUSG00000113479	0	0	0	3	1	3	1	5	6
ENSMUSG00000054693	4080	3846	4400	2922	3245	3585	3721	3543	2694
ENSMUSG00000078664	3	1	3	1	1	1	3	2	9
ENSMUSG00000064016	7	3	4	1	0	1	0	0	1
ENSMUSG00000113470	0	0	0	0	0	0	0	0	0
ENSMUSG00000113471	0	0	0	0	0	0	0	0	0
ENSMUSG00000113472	3	1	1	0	0	0	0	0	0
ENSMUSG00000113473	35	36	38	7	3	16	10	17	11
ENSMUSG00000039097	0	3	0	0	0	1	0	0	0
ENSMUSG00000040086	0	0	0	1	0	0	0	0	0
ENSMUSG00000039098	0	0	0	0	0	0	0	0	0
ENSMUSG00000064010	0	0	0	0	0	0	0	0	0
ENSMUSG00000039095	0	0	0	0	0	0	0	0	0
ENSMUSG00000039096	173	167	194	123	134	174	167	161	114
ENSMUSG00000039099	16	22	13	13	14	18	23	9	9
ENSMUSG00000040084	3252	3228	3715	2867	3124	3355	3422	3842	3022
ENSMUSG00000078668	0	0	0	0	0	0	0	0	0
ENSMUSG00000078650	0	0	0	0	0	0	0	0	1
ENSMUSG00000113485	0	0	0	0	0	0	0	0	0
ENSMUSG00000078651	177	138	219	60	68	79	82	76	40
ENSMUSG00000113486	0	0	0	0	0	0	0	0	0
ENSMUSG00000113487	0	0	0	0	0	0	0	0	0
ENSMUSG00000113488	0	2	3	0	4	3	3	10	2
ENSMUSG00000113489	0	0	0	0	0	0	0	0	0
ENSMUSG00000078655	0	0	0	0	0	0	0	0	0
ENSMUSG00000078652	3681	4127	4482	3064	3721	3730	4025	4587	3257
ENSMUSG00000078653	10	4	3	5	6	4	3	6	3
ENSMUSG00000113480	0	0	0	0	0	0	0	0	0
ENSMUSG00000113481	0	0	1	0	0	0	0	0	0
ENSMUSG00000113482	0	0	0	0	0	0	0	0	0
ENSMUSG00000113483	0	0	0	0	0	0	0	0	0
ENSMUSG00000039092	0	0	0	0	0	0	0	0	0
ENSMUSG00000113484	0	0	0	0	0	0	0	0	0
ENSMUSG00000039086	273	296	329	111	128	111	125	119	115
ENSMUSG00000039087	1172	1243	1320	476	489	534	543	614	458
ENSMUSG00000039084	0	0	0	0	0	0	0	0	0
ENSMUSG00000040078	2513	2268	2714	1970	2304	2437	2427	2704	2014
ENSMUSG00000039089	664	661	792	310	430	476	440	553	403
ENSMUSG00000064023	3	1	1	4	5	5	4	1	3
ENSMUSG00000078656	16	22	23	6	19	12	18	25	5
ENSMUSG00000078657	0	0	0	0	0	0	0	0	0
ENSMUSG00000029672	1494	1428	1722	1252	1418	1519	1429	1561	1090
ENSMUSG00000029673	0	0	0	0	0	0	0	0	0
ENSMUSG00000030662	9036	8599	10196	7698	8177	9603	8926	9841	7146
ENSMUSG00000029674	969	1093	1175	929	1128	1059	1221	1353	1043
ENSMUSG00000054630	0	0	0	0	0	0	0	0	0
ENSMUSG00000029675	0	0	0	0	0	2	0	0	0
ENSMUSG00000030660	3143	2945	3685	1654	1842	2124	1976	1906	1284
ENSMUSG00000078600	0	0	0	0	0	0	0	0	0
ENSMUSG00000029670	444	446	523	370	433	426	456	491	391
ENSMUSG00000029671	0	0	0	0	0	0	0	0	0
ENSMUSG00000029676	949	959	1100	688	787	1051	922	916	677
ENSMUSG00000029678	0	0	0	0	0	0	0	0	0
ENSMUSG00000029679	0	2	0	1	1	0	0	0	0
ENSMUSG00000015023	1501	1519	1628	1410	1486	1708	1695	1827	1493
ENSMUSG00000030669	0	1	0	1	0	0	0	0	0
ENSMUSG00000078604	1	2	0	2	2	1	1	4	1
ENSMUSG00000078601	0	1	0	0	0	0	0	0	0
ENSMUSG00000078607	4	13	14	12	16	21	9	19	4
ENSMUSG00000030666	17	23	21	28	21	36	33	23	11
ENSMUSG00000030663	1720	1727	1963	1906	2389	2534	2326	2686	2004
ENSMUSG00000078605	0	0	0	0	0	0	0	0	0
ENSMUSG00000015027	452	396	449	482	475	567	572	587	451
ENSMUSG00000030664	0	1	0	0	1	0	0	1	0
ENSMUSG00000078606	48	54	43	161	112	217	74	63	16
ENSMUSG00000029661	1565	1686	1767	1046	1203	1246	1176	1263	834
ENSMUSG00000030650	1	1	0	3	0	2	0	3	0
ENSMUSG00000030651	0	0	0	0	0	0	0	0	0
ENSMUSG00000054640	3	2	11	2	2	1	4	3	0
ENSMUSG00000029663	0	0	0	0	0	0	0	0	0
ENSMUSG00000054641	0	0	1	0	0	1	3	0	0
ENSMUSG00000029664	0	0	0	0	0	0	0	0	0
ENSMUSG00000029660	38	54	68	31	26	35	41	46	32
ENSMUSG00000029669	1	3	2	1	8	5	2	1	1
ENSMUSG00000030659	246	224	268	174	146	190	194	220	169
ENSMUSG00000054648	682	599	736	478	555	665	575	663	459
ENSMUSG00000030657	1	0	1	0	0	0	0	0	0
ENSMUSG00000030654	1536	1385	1680	1382	1566	1917	1724	1761	1098
ENSMUSG00000030655	12720	12048	13977	4643	4804	5462	5066	5260	3669
ENSMUSG00000030652	281	314	321	310	329	305	359	388	319
ENSMUSG00000030653	0	0	0	0	0	0	0	0	0
ENSMUSG00000005683	11189	10923	11929	11694	12882	14126	13452	15084	11123
ENSMUSG00000029650	9	19	16	19	16	21	39	25	7
ENSMUSG00000029651	0	1	0	0	1	0	0	0	0
ENSMUSG00000005681	1	0	0	0	0	0	1	1	1
ENSMUSG00000005682	1397	1405	1569	1210	1127	1289	1415	1374	979
ENSMUSG00000078621	0	0	0	0	0	0	0	0	0
ENSMUSG00000078622	1815	1635	2212	1167	1520	1528	1484	1640	1287
ENSMUSG00000078620	0	1	0	0	0	1	0	0	1
ENSMUSG00000029658	0	0	0	0	0	0	1	0	0
ENSMUSG00000029659	59	71	73	98	92	83	108	83	43
ENSMUSG00000005687	1314	1115	1511	1405	1386	1580	1521	1631	1171
ENSMUSG00000029655	2706	2604	3043	1276	1430	1618	1561	1750	1192
ENSMUSG00000029656	0	0	0	0	0	0	0	0	0
ENSMUSG00000029657	4244	4154	5075	3489	4135	3886	4136	4929	4072
ENSMUSG00000005686	1306	1184	1401	1322	1245	1548	1537	1326	956
ENSMUSG00000015001	0	0	0	0	0	0	0	0	0
ENSMUSG00000030649	740	811	835	763	974	958	1105	1208	974
ENSMUSG00000030647	279	299	329	486	463	527	564	527	515
ENSMUSG00000078625	0	0	0	0	0	0	0	0	0
ENSMUSG00000054659	0	0	0	0	0	0	1	0	0
ENSMUSG00000078626	0	0	0	0	1	0	0	0	0
ENSMUSG00000078624	0	0	0	0	0	0	0	0	0
ENSMUSG00000015002	5811	5488	6340	4216	4559	5177	4833	5015	3108
ENSMUSG00000030643	948	977	1165	380	488	547	518	489	353
ENSMUSG00000030641	696	749	862	595	686	794	784	789	640
ENSMUSG00000078627	1	2	1	0	0	0	0	0	0
ENSMUSG00000029640	1468	1378	1559	1058	1165	1259	1394	1394	1025
ENSMUSG00000054662	0	0	0	0	0	1	1	0	0
ENSMUSG00000029641	28	17	40	41	27	26	56	52	36
ENSMUSG00000029642	1169	1231	1380	1507	1643	1793	1909	2162	1621
ENSMUSG00000078611	0	0	0	0	0	0	0	0	0
ENSMUSG00000029647	2815	2918	3179	921	1051	1050	1137	1202	872
ENSMUSG00000029648	145	177	182	158	156	158	187	136	103
ENSMUSG00000029649	1706	1515	1714	1924	2068	2118	2399	2506	1693
ENSMUSG00000005698	3279	3270	3803	2096	2428	2556	2682	2858	2222
ENSMUSG00000005699	140	138	168	278	347	386	307	388	256
ENSMUSG00000029644	0	0	0	0	0	0	0	0	0
ENSMUSG00000005696	0	0	0	0	0	0	0	0	0
ENSMUSG00000029646	0	0	0	0	0	0	0	0	0
ENSMUSG00000030638	88	69	82	69	89	76	96	93	97
ENSMUSG00000030636	0	0	0	5	5	8	6	2	3
ENSMUSG00000078612	37	32	40	23	28	21	17	26	15
ENSMUSG00000015013	263	235	267	314	325	369	391	418	344
ENSMUSG00000078618	0	0	0	0	0	0	0	0	0
ENSMUSG00000054666	0	0	1	0	0	1	0	0	0
ENSMUSG00000078619	1391	1349	1650	1349	1523	1569	1730	1840	1492
ENSMUSG00000030630	265	266	258	322	309	441	429	422	259
ENSMUSG00000054667	0	0	0	0	0	0	0	0	0
ENSMUSG00000078616	5	8	4	6	5	14	8	9	5
ENSMUSG00000015016	493	397	480	350	361	465	427	500	338
ENSMUSG00000040028	5025	5264	6020	3162	3639	3684	3740	4189	3159
ENSMUSG00000040029	1033	1006	1213	627	696	791	807	867	613
ENSMUSG00000040025	2056	2057	2353	1371	1577	1677	1603	1968	1403
ENSMUSG00000040026	19	21	29	120	93	192	125	64	42
ENSMUSG00000039031	817	685	875	552	579	644	689	721	562
ENSMUSG00000039032	0	1	0	0	1	0	0	0	0
ENSMUSG00000040021	3533	3578	4227	1283	1483	1566	1705	1737	1268
ENSMUSG00000040022	694	768	832	377	430	427	440	483	369
ENSMUSG00000039033	395	440	454	288	282	314	340	372	304
ENSMUSG00000039037	0	0	0	0	0	0	0	0	0
ENSMUSG00000030695	14106	13727	14678	22971	25844	27969	30173	27779	20479
ENSMUSG00000030693	5	11	13	3	5	4	6	9	11
ENSMUSG00000030691	947	950	1069	374	517	585	574	595	457
ENSMUSG00000040017	0	0	0	0	0	0	0	1	1
ENSMUSG00000040018	1166	1136	1356	965	1045	1221	1135	1331	835
ENSMUSG00000040013	0	0	0	0	0	0	0	0	0
ENSMUSG00000040016	0	3	0	0	0	0	0	0	0
ENSMUSG00000039021	10	16	10	14	5	23	18	17	15
ENSMUSG00000040010	7742	8308	8875	8557	9285	10925	7862	9551	6664
ENSMUSG00000054604	5117	4365	5424	3731	4285	4675	4514	4394	3354
ENSMUSG00000030699	1	5	8	4	0	6	4	6	2
ENSMUSG00000030697	2561	2572	2749	2979	3275	3129	3420	3795	2842
ENSMUSG00000030683	4	11	15	1	5	2	4	9	3
ENSMUSG00000029695	0	0	0	0	0	0	0	0	0
ENSMUSG00000030681	1369	1231	1351	1679	1667	1946	1919	1890	1370
ENSMUSG00000029697	0	0	0	0	0	0	0	0	0
ENSMUSG00000030682	1245	1307	1420	1438	1740	1712	1783	2078	1516
ENSMUSG00000030680	0	0	0	0	0	0	0	0	0
ENSMUSG00000040006	247	196	245	279	341	381	366	367	242
ENSMUSG00000040007	952	1065	1021	861	996	960	1131	1178	807
ENSMUSG00000040009	40	67	49	66	53	83	69	62	55
ENSMUSG00000029699	54	39	61	102	94	141	94	123	64
ENSMUSG00000040003	73	72	70	75	91	90	83	99	55
ENSMUSG00000039013	0	0	0	0	0	0	0	0	0
ENSMUSG00000054618	0	0	0	1	0	0	0	0	0
ENSMUSG00000054619	70	98	126	133	161	167	125	150	113
ENSMUSG00000039018	241	223	248	256	241	298	256	288	227
ENSMUSG00000030689	1388	1469	1716	1429	1552	1658	1698	1842	1683
ENSMUSG00000039016	105	90	96	112	156	150	118	169	240
ENSMUSG00000030688	124	132	146	227	229	312	297	290	173
ENSMUSG00000054611	6475	6528	7431	3800	4071	4405	4719	4957	3532
ENSMUSG00000030685	166	180	189	205	207	184	169	218	186
ENSMUSG00000054612	0	0	0	0	0	0	0	0	0
ENSMUSG00000029683	0	0	0	2	0	0	0	0	0
ENSMUSG00000030672	13	10	8	10	16	11	13	22	10
ENSMUSG00000029684	2889	2837	3482	1515	1979	2051	1917	1968	1492
ENSMUSG00000029685	31	32	24	18	13	10	14	11	11
ENSMUSG00000030670	0	0	0	0	0	0	0	0	0
ENSMUSG00000029686	4236	3905	4643	3204	3640	3906	3933	4252	3278
ENSMUSG00000030671	544	530	609	417	495	466	514	476	316
ENSMUSG00000113400	0	0	0	0	0	0	0	0	0
ENSMUSG00000113401	0	0	0	0	0	0	0	0	0
ENSMUSG00000029680	0	1	0	0	0	0	0	0	0
ENSMUSG00000113402	0	0	0	0	0	0	0	0	0
ENSMUSG00000029681	366	333	402	353	371	425	413	428	439
ENSMUSG00000113403	2	0	3	0	2	0	2	7	2
ENSMUSG00000029682	0	0	0	0	0	0	0	0	0
ENSMUSG00000113404	0	0	0	0	0	0	0	0	0
ENSMUSG00000029687	2352	2199	2652	1532	1677	1909	1760	2098	1794
ENSMUSG00000015053	110	114	144	137	136	159	161	184	170
ENSMUSG00000039000	4751	4255	5143	3185	3752	3883	3840	4177	2964
ENSMUSG00000039001	1229	914	1299	1373	1237	1472	1582	1542	1832
ENSMUSG00000113405	0	0	0	0	0	0	2	0	0
ENSMUSG00000039007	1365	1312	1506	1187	1280	1513	1393	1376	970
ENSMUSG00000054626	381	248	438	313	388	412	397	394	408
ENSMUSG00000113406	0	0	0	0	0	0	0	0	0
ENSMUSG00000030678	1510	1551	1667	1505	1672	1634	1860	2170	1881
ENSMUSG00000039004	87	82	82	125	102	102	110	118	89
ENSMUSG00000113407	0	0	0	0	0	0	0	0	0
ENSMUSG00000039005	964	899	1112	666	807	920	775	747	569
ENSMUSG00000113408	0	0	0	0	0	0	0	0	0
ENSMUSG00000113409	0	0	0	0	0	0	0	1	0
ENSMUSG00000030677	1937	1830	1965	1963	2102	2474	2458	2851	2013
ENSMUSG00000054622	21	20	34	31	40	48	57	52	32
ENSMUSG00000030674	0	0	0	1	0	0	0	0	0
ENSMUSG00000005505	737	693	749	771	835	825	909	1020	737
ENSMUSG00000005503	0	0	0	0	0	0	0	0	0
ENSMUSG00000005501	2021	1816	2151	1163	1221	1374	1370	1588	1021
ENSMUSG00000005506	6504	6731	7764	2972	3281	3526	3666	3949	2768
ENSMUSG00000005514	2420	2508	2778	2773	2924	2937	3505	3532	2783
ENSMUSG00000005510	770	668	808	987	967	1157	1082	1166	934
ENSMUSG00000005540	0	0	0	0	0	2	0	0	0
ENSMUSG00000029510	0	0	0	0	0	0	0	0	0
ENSMUSG00000029516	3770	3849	4145	1657	1616	1936	2327	2290	1860
ENSMUSG00000029517	3	1	5	3	5	0	0	0	3
ENSMUSG00000005547	0	0	0	0	0	0	0	0	0
ENSMUSG00000029518	1850	1701	1791	1680	1880	1899	2008	2229	1686
ENSMUSG00000029512	1287	1240	1406	993	1065	1219	1265	1277	868
ENSMUSG00000029513	870	916	1011	793	871	914	1069	1124	892
ENSMUSG00000030509	641	702	782	409	452	484	504	511	312
ENSMUSG00000030507	0	0	0	0	0	0	0	0	0
ENSMUSG00000030505	1333	1312	1476	954	1155	1327	1100	1267	905
ENSMUSG00000030500	0	0	1	0	3	0	0	0	0
ENSMUSG00000029504	1113	1119	1221	1011	1041	1128	1148	1293	1004
ENSMUSG00000029505	7891	7889	8873	4017	4160	4632	4827	5166	3870
ENSMUSG00000029507	965	835	977	776	803	855	878	1099	903
ENSMUSG00000029500	1301	1289	1503	1304	1615	1685	1662	1825	1370
ENSMUSG00000029501	2132	1929	2413	1545	1724	1958	1859	2163	1677
ENSMUSG00000005553	0	0	0	0	0	0	0	0	0
ENSMUSG00000029502	2180	2075	2332	1297	1323	1487	1549	1663	1305
ENSMUSG00000029503	1	0	0	0	0	0	0	0	0
ENSMUSG00000005533	6527	6323	7444	2295	2200	2601	2773	2888	2075
ENSMUSG00000005534	2547	2355	2656	1211	1183	1435	1378	1411	1006
ENSMUSG00000113375	0	0	0	0	0	0	0	0	0
ENSMUSG00000113376	0	0	0	0	0	0	0	0	0
ENSMUSG00000113377	0	0	0	0	0	0	0	0	0
ENSMUSG00000113378	0	0	0	0	0	0	0	0	0
ENSMUSG00000113379	31	25	50	3	5	2	4	8	2
ENSMUSG00000113370	1	1	0	0	0	0	1	0	1
ENSMUSG00000113371	1	1	0	0	0	0	0	0	0
ENSMUSG00000113372	0	0	0	0	0	0	0	0	0
ENSMUSG00000113373	0	0	0	0	0	0	0	0	0
ENSMUSG00000113374	0	0	0	0	0	0	0	0	0
ENSMUSG00000113386	0	0	2	0	0	0	0	0	0
ENSMUSG00000113387	0	0	0	0	0	0	0	0	0
ENSMUSG00000113388	0	0	0	0	0	0	0	0	0
ENSMUSG00000113389	13	13	14	14	13	24	18	28	23
ENSMUSG00000113380	0	0	0	0	0	0	0	0	0
ENSMUSG00000113381	0	0	0	0	0	0	0	0	0
ENSMUSG00000113382	0	0	0	0	0	0	0	0	0
ENSMUSG00000113383	0	0	0	0	0	0	0	0	0
ENSMUSG00000113384	0	0	0	0	0	0	0	0	0
ENSMUSG00000113385	77	73	77	55	90	112	96	120	76
ENSMUSG00000113397	0	0	0	0	0	0	0	0	0
ENSMUSG00000113398	0	0	0	0	0	0	0	0	0
ENSMUSG00000113399	0	0	0	0	0	0	0	0	0
ENSMUSG00000113390	0	0	0	0	0	0	0	0	0
ENSMUSG00000113391	1	0	0	0	1	0	1	0	0
ENSMUSG00000113392	5	3	8	2	0	1	0	0	0
ENSMUSG00000113393	0	0	0	0	0	0	0	0	0
ENSMUSG00000113394	0	0	0	0	0	0	0	0	0
ENSMUSG00000113395	6	1	7	2	2	0	2	0	0
ENSMUSG00000113396	1	0	0	0	0	0	0	0	0
ENSMUSG00000078485	1160	1184	1298	1056	1012	1260	1201	1194	865
ENSMUSG00000078486	10	7	9	11	14	18	6	4	1
ENSMUSG00000078489	0	0	0	0	0	0	0	0	0
ENSMUSG00000078487	0	0	0	0	0	0	0	1	0
ENSMUSG00000078488	0	0	0	0	0	0	0	0	0
ENSMUSG00000078481	0	0	0	0	0	0	0	0	0
ENSMUSG00000078480	18	18	10	18	31	29	24	30	24
ENSMUSG00000078496	2	1	2	1	0	7	3	3	3
ENSMUSG00000078497	12	7	5	6	7	5	7	7	7
ENSMUSG00000078494	6	1	3	1	0	0	0	1	3
ENSMUSG00000078495	298	215	363	256	342	327	266	260	237
ENSMUSG00000078498	0	0	3	0	0	0	0	0	0
ENSMUSG00000078492	0	1	0	2	5	0	0	1	0
ENSMUSG00000078490	47	44	69	41	46	40	45	61	32
ENSMUSG00000078491	0	0	0	0	0	0	0	0	0
ENSMUSG00000054598	4	2	2	3	6	15	5	10	10
ENSMUSG00000078566	990	975	987	1827	2648	2913	3348	2230	1249
ENSMUSG00000054594	0	3	6	0	2	3	0	1	2
ENSMUSG00000103969	0	0	0	0	0	0	0	0	0
ENSMUSG00000103967	2	6	5	0	2	0	1	0	0
ENSMUSG00000103968	0	0	0	0	0	0	0	0	0
ENSMUSG00000103961	0	0	0	0	0	0	0	0	0
ENSMUSG00000103962	0	0	0	0	0	0	0	0	0
ENSMUSG00000103960	0	0	0	0	0	0	0	0	0
ENSMUSG00000103965	0	0	0	0	0	0	0	0	0
ENSMUSG00000103966	2	3	3	1	0	0	1	2	0
ENSMUSG00000103963	0	0	0	0	0	0	0	0	0
ENSMUSG00000103964	7	6	3	1	1	1	1	2	1
ENSMUSG00000078552	17	11	12	2	6	5	9	4	5
ENSMUSG00000113300	0	0	0	0	0	0	0	0	0
ENSMUSG00000113301	0	0	0	0	0	0	0	0	0
ENSMUSG00000113302	0	0	4	0	0	0	1	0	1
ENSMUSG00000113303	0	0	0	0	0	0	0	0	0
ENSMUSG00000113304	0	0	0	0	0	0	0	0	0
ENSMUSG00000078554	0	2	0	0	0	1	0	0	1
ENSMUSG00000113305	0	0	0	0	0	0	0	0	0
ENSMUSG00000103958	0	0	3	3	0	0	0	1	0
ENSMUSG00000103959	12	21	30	1	0	2	1	1	1
ENSMUSG00000103956	0	0	0	0	0	0	0	0	0
ENSMUSG00000103957	0	3	0	2	2	0	2	2	1
ENSMUSG00000103950	0	0	0	0	0	0	0	0	0
ENSMUSG00000103951	0	0	0	0	0	0	0	0	0
ENSMUSG00000103954	0	0	0	0	0	0	0	0	0
ENSMUSG00000103955	0	0	0	0	0	0	0	0	0
ENSMUSG00000103952	22	17	24	4	1	0	4	4	0
ENSMUSG00000103953	0	3	2	0	0	0	0	0	0
ENSMUSG00000113306	0	0	0	0	0	0	0	0	0
ENSMUSG00000113307	0	0	0	0	0	0	0	0	0
ENSMUSG00000113308	0	0	0	0	0	0	0	2	0
ENSMUSG00000113309	1	0	0	0	0	0	0	0	0
ENSMUSG00000078584	410	415	485	336	343	404	432	438	323
ENSMUSG00000113310	0	0	0	0	0	0	0	0	0
ENSMUSG00000113311	0	0	0	0	0	0	0	0	0
ENSMUSG00000113312	0	0	0	0	0	0	0	0	0
ENSMUSG00000078588	8	19	20	7	7	8	5	7	6
ENSMUSG00000113313	0	0	0	0	0	0	0	0	0
ENSMUSG00000113314	0	0	0	0	0	0	0	0	0
ENSMUSG00000078586	0	0	0	0	0	0	0	0	0
ENSMUSG00000113315	2	0	3	0	0	0	0	0	0
ENSMUSG00000113316	0	0	0	0	0	0	0	0	0
ENSMUSG00000103947	19	12	10	0	2	2	2	0	0
ENSMUSG00000103948	0	0	0	0	0	0	0	0	0
ENSMUSG00000103945	78	91	72	2	16	11	13	11	11
ENSMUSG00000078580	178	145	217	395	432	427	456	497	383
ENSMUSG00000103949	0	0	0	0	0	0	0	0	0
ENSMUSG00000103940	33	30	36	40	33	39	42	40	35
ENSMUSG00000103943	0	0	0	0	0	0	0	0	0
ENSMUSG00000103944	0	0	0	0	0	0	0	0	0
ENSMUSG00000103942	0	0	0	0	0	0	0	0	0
ENSMUSG00000113317	0	0	0	0	0	0	0	0	0
ENSMUSG00000113318	1	0	2	1	3	2	1	1	1
ENSMUSG00000113319	0	0	0	0	0	0	0	0	0
ENSMUSG00000030595	200	170	188	285	246	306	314	416	359
ENSMUSG00000113320	0	0	0	0	0	0	0	0	0
ENSMUSG00000113321	0	0	1	0	0	1	2	3	0
ENSMUSG00000113322	0	0	0	0	0	1	0	0	0
ENSMUSG00000078572	55	37	32	71	62	73	59	115	82
ENSMUSG00000113323	0	0	0	0	0	0	0	0	0
ENSMUSG00000030591	1662	1630	1826	2283	2381	2663	2802	2922	2368
ENSMUSG00000078577	0	0	0	0	0	2	0	0	0
ENSMUSG00000113324	0	0	0	0	0	0	0	0	0
ENSMUSG00000030592	4	4	5	4	2	2	4	2	0
ENSMUSG00000078578	6406	6213	7882	4618	6140	5838	5525	5990	4585
ENSMUSG00000113325	0	0	0	0	0	0	0	0	0
ENSMUSG00000078575	0	0	0	0	0	0	0	0	0
ENSMUSG00000113326	183	234	237	56	61	61	72	82	42
ENSMUSG00000030590	53	47	53	49	41	59	60	65	35
ENSMUSG00000078576	0	0	0	0	0	0	0	0	0
ENSMUSG00000113327	0	0	0	0	0	0	0	0	0
ENSMUSG00000103936	0	0	0	0	0	0	0	0	0
ENSMUSG00000103937	188	185	253	24	27	23	21	17	11
ENSMUSG00000103934	0	0	0	0	0	0	0	0	0
ENSMUSG00000103935	0	0	0	0	0	0	0	0	0
ENSMUSG00000078570	125	153	161	245	311	257	264	317	256
ENSMUSG00000103938	0	0	0	0	0	0	0	0	0
ENSMUSG00000103939	0	0	0	0	0	0	0	0	0
ENSMUSG00000103932	55	49	84	2	11	6	9	4	3
ENSMUSG00000103933	0	0	0	0	0	0	0	0	0
ENSMUSG00000103930	0	0	0	0	0	0	0	0	0
ENSMUSG00000103931	0	0	0	0	0	0	0	0	0
ENSMUSG00000113328	355	345	374	50	64	88	62	67	43
ENSMUSG00000113329	0	0	0	0	0	0	0	0	0
ENSMUSG00000030598	132	114	133	96	125	157	147	160	117
ENSMUSG00000113331	10	15	8	0	7	4	6	3	8
ENSMUSG00000113332	2	0	2	2	0	1	0	1	4
ENSMUSG00000113333	0	0	0	0	0	0	0	0	0
ENSMUSG00000113334	0	0	0	4	0	0	0	2	1
ENSMUSG00000113335	0	0	0	0	2	4	0	0	0
ENSMUSG00000113336	0	0	0	0	0	0	0	0	0
ENSMUSG00000078520	0	0	0	0	0	0	0	0	0
ENSMUSG00000113337	0	0	0	0	0	0	0	0	0
ENSMUSG00000078521	431	375	449	364	390	453	463	478	334
ENSMUSG00000113338	7	8	7	5	12	3	5	2	3
ENSMUSG00000103925	0	2	1	6	7	8	8	3	10
ENSMUSG00000103926	23	28	14	0	0	4	8	0	1
ENSMUSG00000103923	0	0	0	0	0	0	0	0	0
ENSMUSG00000103924	0	0	0	0	0	0	0	0	0
ENSMUSG00000103929	0	0	0	1	0	0	3	0	1
ENSMUSG00000103927	0	0	0	0	0	0	0	0	0
ENSMUSG00000103928	125	139	194	10	18	28	16	18	19
ENSMUSG00000113330	0	0	0	0	0	0	0	0	0
ENSMUSG00000103921	7	3	21	14	20	14	10	16	9
ENSMUSG00000103922	6	1	6	7	5	6	13	11	3
ENSMUSG00000103920	0	0	0	0	0	0	0	0	0
ENSMUSG00000113339	0	0	0	0	0	0	0	0	0
ENSMUSG00000054555	41	39	43	15	32	24	22	30	31
ENSMUSG00000054556	83	80	84	39	48	39	37	40	34
ENSMUSG00000078528	96	88	86	4	9	5	4	10	10
ENSMUSG00000113342	2	1	0	0	0	0	2	0	0
ENSMUSG00000113343	0	0	0	0	0	0	0	0	0
ENSMUSG00000113344	0	0	0	0	0	0	0	0	0
ENSMUSG00000113345	0	0	0	0	0	0	0	0	0
ENSMUSG00000078511	12	6	4	0	4	5	6	2	8
ENSMUSG00000113346	0	0	0	0	1	0	1	3	0
ENSMUSG00000078512	2	3	7	2	0	2	0	1	0
ENSMUSG00000113347	0	0	0	0	0	0	0	0	0
ENSMUSG00000113348	0	0	0	0	0	0	1	1	0
ENSMUSG00000078510	0	0	1	0	0	0	0	0	0
ENSMUSG00000113349	63	65	65	22	29	16	30	38	19
ENSMUSG00000103914	0	0	0	0	0	0	0	0	0
ENSMUSG00000103915	0	0	0	0	0	0	0	0	0
ENSMUSG00000103912	0	0	0	0	0	0	0	0	0
ENSMUSG00000103913	0	0	0	0	0	0	0	0	0
ENSMUSG00000103918	0	0	0	0	0	0	0	0	0
ENSMUSG00000103919	0	0	0	0	0	0	0	0	0
ENSMUSG00000103916	0	0	3	0	0	1	0	0	0
ENSMUSG00000113340	0	0	0	0	0	0	0	0	0
ENSMUSG00000103917	0	0	0	0	0	0	0	0	0
ENSMUSG00000113341	87	110	110	12	15	13	13	9	3
ENSMUSG00000103911	8	9	12	0	0	0	0	4	0
ENSMUSG00000078515	2143	2001	2335	975	1044	1164	1215	1290	1053
ENSMUSG00000078513	0	0	0	0	0	0	0	0	0
ENSMUSG00000078519	0	0	3	0	0	0	3	3	0
ENSMUSG00000054568	153	162	191	219	220	335	203	218	106
ENSMUSG00000078517	2776	2745	3255	1627	1778	1946	1822	2084	1438
ENSMUSG00000078518	0	0	0	2	0	0	0	0	0
ENSMUSG00000113353	0	3	1	0	0	0	0	0	0
ENSMUSG00000113354	0	0	0	0	0	0	0	0	0
ENSMUSG00000103909	0	0	0	0	0	0	0	0	0
ENSMUSG00000113355	0	0	0	0	0	0	0	0	0
ENSMUSG00000113356	0	0	0	0	0	0	0	0	0
ENSMUSG00000113357	8	2	17	2	2	0	1	0	1
ENSMUSG00000113358	0	0	0	0	0	0	0	0	0
ENSMUSG00000113359	0	1	0	0	0	2	0	0	0
ENSMUSG00000103903	0	0	0	0	0	0	0	0	0
ENSMUSG00000103904	0	0	1	0	0	0	2	0	0
ENSMUSG00000103901	126	99	143	19	28	18	17	16	9
ENSMUSG00000103902	0	0	0	0	0	0	0	0	0
ENSMUSG00000103907	27	22	32	10	2	3	2	5	3
ENSMUSG00000103908	0	1	1	0	0	0	0	1	0
ENSMUSG00000113350	0	0	0	0	0	0	0	0	0
ENSMUSG00000103905	0	0	0	0	0	0	0	0	0
ENSMUSG00000113351	0	0	0	0	0	0	0	0	0
ENSMUSG00000103906	165	154	143	185	181	154	188	251	179
ENSMUSG00000113352	0	0	0	0	0	0	0	0	0
ENSMUSG00000103900	2	3	0	0	1	1	0	0	0
ENSMUSG00000078546	113	71	134	82	92	86	68	86	68
ENSMUSG00000113364	0	0	0	0	0	0	0	0	0
ENSMUSG00000113365	0	0	0	0	0	0	0	0	0
ENSMUSG00000113366	0	0	0	0	0	0	0	0	0
ENSMUSG00000113367	0	0	0	0	0	0	0	0	0
ENSMUSG00000054580	1	6	1	11	11	9	8	10	2
ENSMUSG00000113368	0	0	0	0	0	0	0	1	1
ENSMUSG00000113369	0	0	0	0	0	0	0	0	0
ENSMUSG00000054582	12	10	13	0	4	3	2	7	2
ENSMUSG00000078531	0	0	0	0	0	0	0	0	0
ENSMUSG00000078532	189	189	227	171	236	222	224	291	196
ENSMUSG00000113360	0	0	0	0	0	0	0	0	0
ENSMUSG00000113361	13	14	9	16	14	18	10	37	24
ENSMUSG00000113362	0	0	0	0	0	0	2	1	0
ENSMUSG00000113363	0	0	0	0	0	0	0	0	0
ENSMUSG00000078537	0	0	0	4	2	0	0	0	1
ENSMUSG00000054589	5	10	13	5	11	9	6	9	7
ENSMUSG00000029551	89	94	115	134	157	141	140	133	97
ENSMUSG00000029552	4195	3955	4715	3486	3900	4430	4768	4907	3710
ENSMUSG00000030541	5049	4287	5390	6258	6040	7205	7442	7611	5514
ENSMUSG00000029553	0	0	0	0	0	0	0	0	0
ENSMUSG00000005583	254	232	273	107	109	139	158	135	99
ENSMUSG00000029554	1530	1369	1725	1045	1167	1221	1220	1452	1252
ENSMUSG00000054510	0	0	0	0	0	0	0	0	0
ENSMUSG00000005580	836	828	985	429	429	494	511	542	361
ENSMUSG00000029550	1535	1732	1752	1267	1276	1442	1377	1458	1018
ENSMUSG00000029559	430	415	455	467	557	596	687	721	543
ENSMUSG00000029556	0	0	0	0	0	0	0	0	0
ENSMUSG00000029557	92	107	119	129	133	128	139	152	117
ENSMUSG00000054519	319	295	306	231	251	290	249	214	181
ENSMUSG00000030549	1	0	1	0	0	1	0	1	0
ENSMUSG00000030546	0	0	1	1	0	1	0	3	2
ENSMUSG00000054517	242	221	263	124	136	131	182	164	135
ENSMUSG00000030544	0	0	0	0	0	0	0	0	0
ENSMUSG00000030545	155	146	181	173	229	236	219	214	153
ENSMUSG00000030543	0	0	0	0	0	0	0	0	0
ENSMUSG00000054514	5	10	5	4	4	9	6	6	5
ENSMUSG00000029541	0	0	0	0	0	0	0	0	0
ENSMUSG00000030530	3414	3717	3997	2817	3133	3213	3585	3928	3113
ENSMUSG00000054520	251	179	232	212	238	249	299	261	180
ENSMUSG00000029544	92	119	133	66	62	119	69	90	44
ENSMUSG00000029545	770	767	826	1072	1093	1208	1299	1257	894
ENSMUSG00000029546	0	0	0	0	0	0	0	0	0
ENSMUSG00000029547	3574	3584	3903	3309	3583	3723	4027	4364	3570
ENSMUSG00000030539	1426	1394	1492	1103	1026	1145	1249	1283	977
ENSMUSG00000054526	0	0	0	0	0	0	0	0	0
ENSMUSG00000030538	293	315	339	423	438	499	488	487	482
ENSMUSG00000030536	14228	13249	15008	10151	11005	13135	13218	13436	10038
ENSMUSG00000030533	1230	1195	1345	1456	1575	1526	1742	1852	1324
ENSMUSG00000030534	414	407	452	299	251	302	275	400	271
ENSMUSG00000054523	0	0	0	0	0	0	0	0	0
ENSMUSG00000030532	0	0	2	2	0	0	5	1	1
ENSMUSG00000029530	0	0	0	0	0	0	0	1	0
ENSMUSG00000078500	0	0	0	1	0	0	0	1	0
ENSMUSG00000029538	954	885	1054	756	862	918	995	1068	814
ENSMUSG00000005566	9290	8757	10149	9358	10502	10693	11070	12459	9865
ENSMUSG00000029534	800	811	891	566	697	746	641	742	571
ENSMUSG00000029535	170	131	144	188	202	225	230	291	177
ENSMUSG00000029536	356	445	432	394	435	405	504	562	417
ENSMUSG00000030528	1865	1916	2297	1167	1341	1494	1448	1577	1083
ENSMUSG00000054537	0	0	0	0	0	0	0	0	0
ENSMUSG00000078504	0	0	0	0	0	1	1	0	0
ENSMUSG00000030527	1209	1231	1389	683	703	795	797	882	723
ENSMUSG00000078505	0	0	0	0	0	0	0	0	0
ENSMUSG00000078502	5	1	0	1	0	1	0	2	2
ENSMUSG00000030525	0	0	0	0	0	0	0	0	0
ENSMUSG00000078503	0	0	0	0	0	0	0	0	0
ENSMUSG00000030522	1743	1600	1853	1025	1208	1183	1208	1296	977
ENSMUSG00000078508	0	0	0	0	0	0	0	0	0
ENSMUSG00000030523	1	1	3	1	0	0	0	2	1
ENSMUSG00000078509	0	1	0	0	0	0	0	0	0
ENSMUSG00000078506	0	0	0	1	0	0	0	0	0
ENSMUSG00000030521	446	488	619	373	468	437	463	511	483
ENSMUSG00000078507	0	0	0	0	0	0	0	0	0
ENSMUSG00000029521	672	600	755	704	731	875	873	808	577
ENSMUSG00000029526	0	0	0	0	0	0	0	0	0
ENSMUSG00000029528	2609	2998	3175	2484	2767	2850	3275	3327	2675
ENSMUSG00000029522	0	0	0	2	0	1	0	0	0
ENSMUSG00000005575	1917	2125	2405	2198	2751	2556	2917	3183	2891
ENSMUSG00000029524	161	130	166	137	156	164	165	154	121
ENSMUSG00000030519	0	0	0	0	0	0	0	0	0
ENSMUSG00000030518	28	42	32	38	40	49	32	31	16
ENSMUSG00000030515	712	594	825	552	615	683	676	794	578
ENSMUSG00000030516	11472	11521	13323	7325	7741	8833	9028	9150	6518
ENSMUSG00000030513	0	0	1	0	0	0	0	0	0
ENSMUSG00000030512	672	689	870	631	770	741	800	887	834
ENSMUSG00000054545	8	11	17	0	1	3	0	7	7
ENSMUSG00000030510	20	13	12	3	12	11	8	10	3
ENSMUSG00000029595	0	0	0	0	0	0	0	0	0
ENSMUSG00000030584	134	140	156	149	178	189	231	195	159
ENSMUSG00000029596	1	4	2	11	8	10	6	4	5
ENSMUSG00000029597	0	0	0	0	0	0	1	0	0
ENSMUSG00000029598	1665	1714	1797	1823	1964	2100	2066	2306	1833
ENSMUSG00000030583	2784	3058	3244	1348	1528	1603	1824	1842	1499
ENSMUSG00000029591	328	359	381	261	320	337	378	403	285
ENSMUSG00000029592	717	731	814	663	682	804	885	852	635
ENSMUSG00000029594	1355	1373	1468	1077	1197	1164	1291	1471	1291
ENSMUSG00000029599	2476	2194	2615	2488	2732	3098	2945	3307	2661
ENSMUSG00000030588	552	519	614	895	1001	1122	1028	978	810
ENSMUSG00000030589	0	0	2	0	0	0	0	0	0
ENSMUSG00000030587	0	0	0	1	0	0	0	2	1
ENSMUSG00000029586	4	2	4	4	0	0	5	5	3
ENSMUSG00000029587	942	933	991	667	645	823	879	916	686
ENSMUSG00000029580	134021	140058	156823	110533	122931	125982	134777	150096	133069
ENSMUSG00000029581	10006	10922	12260	8638	9877	9173	11134	12791	13563
ENSMUSG00000103994	0	0	0	0	0	0	0	0	0
ENSMUSG00000103995	0	0	0	0	0	0	0	0	0
ENSMUSG00000103992	0	0	0	0	0	0	0	0	0
ENSMUSG00000103993	0	0	0	0	0	0	0	0	0
ENSMUSG00000103998	0	0	0	0	0	0	0	0	0
ENSMUSG00000103999	33	32	34	36	39	63	33	39	26
ENSMUSG00000103996	25	39	28	2	8	11	9	6	7
ENSMUSG00000103997	0	0	0	0	0	0	0	0	0
ENSMUSG00000030579	0	0	0	0	0	0	0	0	0
ENSMUSG00000030577	0	0	0	0	0	0	0	0	0
ENSMUSG00000103990	0	0	0	0	0	0	0	0	0
ENSMUSG00000103991	0	0	0	0	0	0	0	0	0
ENSMUSG00000030562	115	102	119	53	59	52	46	49	37
ENSMUSG00000029575	448	469	533	528	519	609	648	549	406
ENSMUSG00000030560	286	284	345	303	353	402	344	323	232
ENSMUSG00000029576	53	70	65	66	52	84	93	77	53
ENSMUSG00000029570	343	377	438	265	363	310	351	352	301
ENSMUSG00000029571	4887	4548	5407	2937	3168	3359	3498	3393	2675
ENSMUSG00000103989	0	0	0	0	0	0	0	0	0
ENSMUSG00000029577	4058	4052	4497	3618	4144	4232	4722	5102	3882
ENSMUSG00000029578	2554	2483	2718	2331	2391	2852	2690	2906	2115
ENSMUSG00000103983	121	109	159	37	42	55	35	37	32
ENSMUSG00000103984	43	33	40	5	2	3	4	3	5
ENSMUSG00000103981	0	0	0	0	0	0	0	0	0
ENSMUSG00000103982	0	0	0	0	0	0	0	0	0
ENSMUSG00000103987	0	0	0	0	0	0	0	0	0
ENSMUSG00000103985	0	0	0	0	0	0	0	0	0
ENSMUSG00000103986	0	0	0	0	0	0	0	0	0
ENSMUSG00000103980	0	0	0	0	0	0	0	0	0
ENSMUSG00000030551	2214	2372	2996	1005	1254	1048	1256	1286	1240
ENSMUSG00000029563	144	109	144	48	49	63	65	51	53
ENSMUSG00000029564	0	0	0	0	0	3	0	0	0
ENSMUSG00000029560	821	709	826	738	745	928	802	914	729
ENSMUSG00000029561	1521	1611	1480	5285	4200	6331	3119	2593	1014
ENSMUSG00000103978	0	0	0	0	0	0	0	0	0
ENSMUSG00000103979	0	0	0	0	0	1	1	0	0
ENSMUSG00000029569	1521	1347	1695	1164	1313	1452	1341	1314	958
ENSMUSG00000103972	0	0	0	0	0	0	0	0	0
ENSMUSG00000103973	18	20	19	6	3	1	4	4	7
ENSMUSG00000103970	10	16	14	1	1	0	1	5	1
ENSMUSG00000103971	0	0	0	0	0	0	0	0	0
ENSMUSG00000103976	471	492	513	42	36	38	55	43	31
ENSMUSG00000054509	1145	1100	1228	699	601	800	853	854	500
ENSMUSG00000103977	0	0	0	0	0	0	0	0	0
ENSMUSG00000103975	0	0	0	0	0	0	0	0	0
ENSMUSG00000030559	0	0	0	1	0	0	0	0	0
ENSMUSG00000030557	2187	2184	2698	960	1045	1176	1250	1105	848
ENSMUSG00000030555	650	571	701	394	451	524	482	465	305
ENSMUSG00000030556	237	243	257	271	292	343	328	369	270
ENSMUSG00000030553	0	0	0	0	0	0	0	0	0
ENSMUSG00000030554	61	60	71	34	41	33	51	52	35
ENSMUSG00000039639	0	0	0	0	0	1	0	0	0
ENSMUSG00000001020	15	18	15	20	9	12	10	25	14
ENSMUSG00000040627	0	2	0	0	1	0	0	0	0
ENSMUSG00000040629	0	0	0	0	0	0	0	0	0
ENSMUSG00000001025	13127	11561	14206	17371	18630	20127	21886	21764	17429
ENSMUSG00000001027	0	0	0	1	0	0	0	0	0
ENSMUSG00000040624	12	12	12	2	1	5	4	1	5
ENSMUSG00000001021	24	26	45	37	27	45	21	55	46
ENSMUSG00000001023	8	14	10	5	7	10	10	10	3
ENSMUSG00000040620	2998	2907	3500	1619	1851	1900	1955	2379	1784
ENSMUSG00000040621	235	222	208	209	243	253	291	262	230
ENSMUSG00000001029	0	1	0	0	0	0	0	0	0
ENSMUSG00000039630	17594	16512	20650	10351	11902	12424	12527	14247	12479
ENSMUSG00000039633	287	241	303	130	156	197	182	190	123
ENSMUSG00000039634	231	214	297	237	262	315	240	306	196
ENSMUSG00000015668	864	941	983	1258	1508	1492	1586	1865	1260
ENSMUSG00000039632	5	8	16	5	10	12	8	11	6
ENSMUSG00000039637	780	735	849	458	482	492	600	572	461
ENSMUSG00000015665	0	0	0	0	0	0	0	0	0
ENSMUSG00000064609	12	9	10	1	1	1	1	5	0
ENSMUSG00000039628	0	0	0	0	0	1	0	0	0
ENSMUSG00000064606	0	0	0	0	0	0	0	0	0
ENSMUSG00000039629	58	78	83	41	49	66	78	45	48
ENSMUSG00000040616	0	0	0	0	0	0	0	0	0
ENSMUSG00000040618	2203	2242	2357	3893	3580	5229	3634	3898	2572
ENSMUSG00000001036	2381	2411	2567	1996	2002	2416	2219	2277	1422
ENSMUSG00000064600	11	5	13	4	7	7	2	5	0
ENSMUSG00000040612	1116	1001	1204	583	592	612	742	878	634
ENSMUSG00000064601	0	0	0	0	0	0	0	0	0
ENSMUSG00000040613	133	171	149	183	229	247	175	164	93
ENSMUSG00000001039	280	293	347	327	321	357	438	437	363
ENSMUSG00000040614	0	0	0	0	0	0	0	0	0
ENSMUSG00000064604	0	0	0	0	0	0	0	0	0
ENSMUSG00000064605	0	0	0	0	0	0	0	0	0
ENSMUSG00000001034	725	684	770	748	789	781	884	885	748
ENSMUSG00000064602	16	11	27	10	21	18	15	21	13
ENSMUSG00000040610	1	0	0	0	0	0	0	0	3
ENSMUSG00000015671	1604	1564	1856	1992	2357	2545	2241	2683	2230
ENSMUSG00000015672	210	216	260	219	315	253	303	336	314
ENSMUSG00000039623	253	299	279	197	175	329	238	270	199
ENSMUSG00000039620	0	0	0	0	0	0	0	0	0
ENSMUSG00000039621	33	32	33	39	33	47	28	36	24
ENSMUSG00000064619	0	0	0	0	0	0	0	0	0
ENSMUSG00000039617	16	15	7	14	20	24	17	26	17
ENSMUSG00000064617	0	0	0	0	0	0	0	0	0
ENSMUSG00000064618	0	0	0	0	0	0	0	0	0
ENSMUSG00000040605	0	0	3	0	0	0	0	0	0
ENSMUSG00000040606	0	0	0	0	0	0	0	0	0
ENSMUSG00000040600	0	0	1	0	0	0	0	0	1
ENSMUSG00000040601	0	0	0	0	0	0	0	0	0
ENSMUSG00000064612	0	0	0	0	0	0	0	0	0
ENSMUSG00000064616	0	0	0	0	0	0	0	0	0
ENSMUSG00000064613	0	0	0	0	0	0	0	0	0
ENSMUSG00000039611	1	0	0	0	0	1	2	0	0
ENSMUSG00000015647	7676	7343	8329	6023	6117	6876	7171	7085	5040
ENSMUSG00000039615	1797	1793	1984	2329	2581	2657	2918	2943	2327
ENSMUSG00000039616	37	41	54	99	70	121	81	89	38
ENSMUSG00000039608	0	0	0	0	0	0	0	0	0
ENSMUSG00000039607	438	468	566	162	181	230	194	188	140
ENSMUSG00000015659	358	304	356	171	132	201	230	221	120
ENSMUSG00000001014	0	0	0	1	2	3	4	3	1
ENSMUSG00000064622	0	0	0	0	0	0	0	0	0
ENSMUSG00000001016	3138	3144	3552	3072	3582	3755	3732	4264	3133
ENSMUSG00000064620	2	2	3	0	1	1	0	0	0
ENSMUSG00000001017	2915	2818	3271	2481	2977	3056	2997	3181	2328
ENSMUSG00000064621	0	0	0	0	0	0	0	0	0
ENSMUSG00000064626	0	0	0	0	0	0	0	0	0
ENSMUSG00000064624	1	1	1	0	0	0	0	0	0
ENSMUSG00000001018	540	530	645	594	699	710	753	758	621
ENSMUSG00000015656	22997	22944	26215	28107	32116	31561	33902	42239	33013
ENSMUSG00000039601	22	27	27	2	15	5	38	24	21
ENSMUSG00000015652	746	726	854	1015	1078	1375	1107	1179	909
ENSMUSG00000015653	5186	5038	5964	3503	3948	4604	4110	3950	2875
ENSMUSG00000001062	552	503	632	542	581	656	636	725	456
ENSMUSG00000025036	327	263	381	214	209	222	236	242	176
ENSMUSG00000040666	11	3	3	0	1	2	0	0	0
ENSMUSG00000025037	1617	1576	1917	1518	1759	1972	1745	2066	1539
ENSMUSG00000040667	2583	2505	2957	2358	2756	3137	2959	3253	2549
ENSMUSG00000025034	1576	1581	1661	1241	1344	1557	1660	1488	1164
ENSMUSG00000025035	375	385	485	350	397	377	486	522	494
ENSMUSG00000040669	600	670	717	695	740	821	779	909	678
ENSMUSG00000001065	547	542	614	519	468	522	545	518	453
ENSMUSG00000040663	1120	1128	1298	590	650	648	843	875	796
ENSMUSG00000025038	0	0	1	0	0	0	0	2	1
ENSMUSG00000039670	23	43	49	67	43	63	61	52	28
ENSMUSG00000040660	0	0	0	0	0	0	0	0	0
ENSMUSG00000040661	2107	2124	2247	891	870	1019	1105	1077	760
ENSMUSG00000039671	2342	2544	2669	1289	1374	1495	1786	1867	1497
ENSMUSG00000039672	4	1	7	0	0	0	0	0	0
ENSMUSG00000039678	1650	1482	1782	1244	1213	1342	1425	1606	1158
ENSMUSG00000039676	1	0	0	0	0	1	5	0	0
ENSMUSG00000040659	707	715	753	604	673	654	798	890	737
ENSMUSG00000025020	5	6	4	2	3	1	4	5	2
ENSMUSG00000025025	578	636	666	841	1002	1175	1291	1060	712
ENSMUSG00000025026	959	963	1061	997	1069	1256	1200	1158	753
ENSMUSG00000040657	0	0	0	0	0	0	0	0	0
ENSMUSG00000025024	1412	1266	1635	1258	1366	1401	1360	1530	1101
ENSMUSG00000040658	443	408	515	615	688	785	674	811	544
ENSMUSG00000001076	0	0	3	1	1	5	2	1	2
ENSMUSG00000040651	1474	1220	1704	529	652	627	546	571	401
ENSMUSG00000040652	799	740	860	755	850	890	910	1003	742
ENSMUSG00000025027	2759	2582	2918	3277	3356	3747	3838	3907	2972
ENSMUSG00000040653	114	90	135	107	108	127	128	132	97
ENSMUSG00000040650	0	0	0	0	0	0	0	0	0
ENSMUSG00000039662	1768	1653	1878	1327	1548	1565	1669	1774	1186
ENSMUSG00000039660	504	471	573	584	562	617	667	741	577
ENSMUSG00000039661	0	0	0	0	1	2	0	1	1
ENSMUSG00000025010	375	362	377	128	125	121	143	184	149
ENSMUSG00000040648	3003	2857	3536	1343	1541	1717	1638	1894	1319
ENSMUSG00000040649	0	0	0	1	0	0	0	0	0
ENSMUSG00000025014	0	0	0	0	1	0	0	0	0
ENSMUSG00000025013	0	0	1	1	0	0	0	0	0
ENSMUSG00000040640	1	1	1	0	0	2	0	0	0
ENSMUSG00000025019	1600	1386	1773	437	455	532	488	489	364
ENSMUSG00000025016	7225	5786	7718	4910	5948	5676	5704	5594	4413
ENSMUSG00000025017	0	0	0	0	0	1	0	1	0
ENSMUSG00000039652	395	418	461	178	157	212	192	177	97
ENSMUSG00000039656	1002	945	1053	1338	1370	1654	1440	1706	1075
ENSMUSG00000039653	10	7	2	1	5	4	1	2	1
ENSMUSG00000001052	3454	3696	4077	1996	2227	2518	2558	2643	2056
ENSMUSG00000001053	299	307	304	395	328	475	495	519	392
ENSMUSG00000025003	0	0	0	0	0	0	0	0	0
ENSMUSG00000025004	0	0	0	0	0	0	0	0	0
ENSMUSG00000025001	5155	4227	6081	2745	3434	3313	3189	3160	2635
ENSMUSG00000025002	57	67	71	59	60	106	81	78	79
ENSMUSG00000001054	498	502	547	523	634	626	654	691	533
ENSMUSG00000025007	6753	6414	7094	9166	9260	11295	9240	9699	6261
ENSMUSG00000025008	245	219	291	217	257	298	311	314	209
ENSMUSG00000001056	1216	1111	1399	1196	1474	1353	1516	1847	2051
ENSMUSG00000040631	395	386	469	427	427	429	510	493	452
ENSMUSG00000025006	392	425	461	184	163	226	211	187	164
ENSMUSG00000040632	0	0	0	0	0	0	0	0	0
ENSMUSG00000039640	1282	1194	1371	1498	1639	1682	1760	2146	1819
ENSMUSG00000039648	69	88	98	73	72	82	85	86	72
ENSMUSG00000015697	3044	3059	3644	2105	2179	2545	2517	2723	1940
ENSMUSG00000039646	1262	1319	1323	1337	1331	1500	1570	1607	1155
ENSMUSG00000015627	0	0	0	0	0	0	0	0	0
ENSMUSG00000015605	1013	1195	1276	872	1079	975	1101	1344	1007
ENSMUSG00000015619	65	71	83	59	61	104	69	75	55
ENSMUSG00000098050	0	0	0	0	0	1	0	0	0
ENSMUSG00000098051	0	0	0	0	0	0	0	0	0
ENSMUSG00000074088	1202	1143	1342	1118	1315	1319	1439	1478	1236
ENSMUSG00000098058	0	0	0	0	0	0	0	0	0
[truncated: 51,380 more rows]
